# Supplementary material
Source: PubMed Central journal article supplement (PMC3993818)
Supplement: JVI.00093-14_zjv999098904so1.pdf [file JVI.00093-14_zjv999098904so1.pdf]

1 Human Papillomavirus community in healthy persons, defined by metagenomics analysis of  
2 HMP (human microbiome project) shotgun sequencing datasets

3  
4  
5  
6

7 Yingfei Ma<sup>a</sup>, Ramana Madupu<sup>b</sup>, Ulas Karaoz<sup>c</sup>, Carlos W Nossa<sup>d</sup>, Liying Yang<sup>a</sup>, Shibu Yooseph<sup>b</sup>,  
8 Patrick S Yachimski<sup>e</sup>, Eoin L Brodie<sup>c</sup>, Karen E Nelson<sup>b</sup>, Zhiheng Pei<sup>a#</sup>

9

10 New York University, School of Medicine, New York, NY<sup>a</sup>; J Craig Venter Institute, Rockville,  
11 MD<sup>b</sup>; Lawrence Berkeley National Laboratory, Berkeley, CA<sup>c</sup>; Rice University, Houston, TX<sup>d</sup>;  
12 Vanderbilt University School of Medicine, Nashville, TN<sup>e</sup>; The Department of Veterans Affairs  
13 New York Harbor Healthcare System, New York, NY<sup>f</sup>

14

15 Running title: Human Papillomavirus in healthy persons

16

17 # Address correspondence to Zhiheng Pei, [Zhiheng.pei@nyumc.org](mailto:Zhiheng.pei@nyumc.org)

18

Phone: 212-952-3433, Fax: 212-263-4108

19

20

Word count for the abstract: 272

21

Word count for the text: 4610

22

23

24

25

26

27

28

29

30

31

32

33  
34

Table S1. Detection of HPV DNA in 748 samples from healthy human subjects

| Subject   | Sample    | Sequencing ID | Site                 | Organ  | HPV type (number of reads)     |
|-----------|-----------|---------------|----------------------|--------|--------------------------------|
| 158256496 | SRS021948 | SRR059425     | Gut                  | Gut    |                                |
| 158256496 | SRS021948 | SRR059424     | Gut                  | Gut    |                                |
| 158256496 | SRS021954 | SRR059427     | Tongue dorsum        | Mouth  |                                |
| 158256496 | SRS021954 | SRR059426     | Tongue dorsum        | Mouth  |                                |
| 158256496 | SRS021960 | SRR059429     | Supragingival plaque | Mouth  |                                |
| 158256496 | SRS021960 | SRR059428     | Supragingival plaque | Mouth  |                                |
| 158256496 | SRS021969 | SRR059431     | Posterior fornix     | Vagina |                                |
| 158256496 | SRS021969 | SRR059430     | Posterior fornix     | Vagina |                                |
| 158256496 | SRS021986 | SRR062093     | Buccal mucosa        | Mouth  |                                |
| 158256496 | SRS021986 | SRR062035     | Buccal mucosa        | Mouth  |                                |
| 158256496 | SRS021986 | SRR062036     | Buccal mucosa        | Mouth  |                                |
| 158256496 | SRS022006 | SRR062077     | Anterior nares       | Skin   |                                |
| 158256496 | SRS022006 | SRR060396     | Anterior nares       | Skin   |                                |
| 158256496 | SRS022006 | SRR060397     | Anterior nares       | Skin   |                                |
| 158256496 | SRS022006 | SRR062076     | Anterior nares       | Skin   |                                |
| 158337416 | SRS012273 | SRR059413     | Gut                  | Gut    |                                |
| 158337416 | SRS012273 | SRR059412     | Gut                  | Gut    |                                |
| 158337416 | SRS012279 | SRR059415     | Tongue dorsum        | Mouth  |                                |
| 158337416 | SRS012279 | SRR059414     | Tongue dorsum        | Mouth  |                                |
| 158337416 | SRS012281 | SRR059448     | Buccal mucosa        | Mouth  |                                |
| 158337416 | SRS012291 | SRR059411     | Anterior nares       | Skin   |                                |
| 158337416 | SRS012291 | SRR059410     | Anterior nares       | Skin   |                                |
| 158337416 | SRS022077 | SRR059511     | Tongue dorsum        | Mouth  |                                |
| 158337416 | SRS022077 | SRR059510     | Tongue dorsum        | Mouth  |                                |
| 158337416 | SRS022079 | SRR059513     | Buccal mucosa        | Mouth  |                                |
| 158337416 | SRS022079 | SRR059512     | Buccal mucosa        | Mouth  |                                |
| 158337416 | SRS022083 | SRR059515     | Supragingival plaque | Mouth  |                                |
| 158337416 | SRS022083 | SRR059514     | Supragingival plaque | Mouth  |                                |
| 158337416 | SRS022092 | SRR059517     | Posterior fornix     | Vagina |                                |
| 158337416 | SRS022092 | SRR059516     | Posterior fornix     | Vagina |                                |
| 158337416 | SRS022093 | SRR063902     | Gut                  | Gut    |                                |
| 158337416 | SRS022093 | SRR063901     | Gut                  | Gut    |                                |
| 158337416 | SRS022129 | SRR060437     | Anterior nares       | Skin   | HPV139 (1)                     |
| 158337416 | SRS022129 | SRR060436     | Anterior nares       | Skin   |                                |
| 158398106 | SRS012663 | SRR062105     | Anterior nares       | Skin   | HPV110 (6),HPV23 (1),HPV80 (3) |
| 158398106 | SRS012663 | SRR061901     | Anterior nares       | Skin   | HPV110 (5),HPV17 (1),HPV80 (1) |
| 158398106 | SRS012663 | SRR061902     | Anterior nares       | Skin   | HPV110 (5),HPV17 (1),HPV80 (2) |
| 158398106 | SRS012663 | SRR062104     | Anterior nares       | Skin   | HPV110 (4),HPV17 (4),HPV80 (1) |
| 158458797 | SRS011061 | SRR060371     | Gut                  | Gut    |                                |

|           |           |           |                      |        |                                                            |
|-----------|-----------|-----------|----------------------|--------|------------------------------------------------------------|
| 158458797 | SRS011061 | SRR060370 | Gut                  | Gut    |                                                            |
| 158458797 | SRS011086 | SRR061958 | Tongue dorsum        | Mouth  |                                                            |
| 158458797 | SRS011086 | SRR061957 | Tongue dorsum        | Mouth  |                                                            |
| 158458797 | SRS011090 | SRR060389 | Buccal mucosa        | Mouth  |                                                            |
| 158458797 | SRS011090 | SRR060388 | Buccal mucosa        | Mouth  |                                                            |
| 158458797 | SRS011098 | SRR062052 | Supragingival plaque | Mouth  |                                                            |
| 158458797 | SRS011098 | SRR059326 | Supragingival plaque | Mouth  |                                                            |
| 158458797 | SRS011098 | SRR059327 | Supragingival plaque | Mouth  |                                                            |
| 158458797 | SRS011098 | SRR062051 | Supragingival plaque | Mouth  |                                                            |
| 158458797 | SRS011105 | SRR060399 | Anterior nares       | Skin   | HPV148 (3),HPV24 (1),N (2)                                 |
| 158458797 | SRS011105 | SRR060398 | Anterior nares       | Skin   | HPV127 (1),HPV148 (8),N (5)                                |
| 158458797 | SRS011111 | SRR062097 | Posterior fornix     | Vagina | HPV121 (2),HPV126 (1),HPV153 (2)                           |
| 158458797 | SRS011111 | SRR059320 | Posterior fornix     | Vagina | HPV153 (2),N (1)                                           |
| 158458797 | SRS011111 | SRR059321 | Posterior fornix     | Vagina | HPV153 (2),HPV74 (1)                                       |
| 158458797 | SRS011111 | SRR062045 | Posterior fornix     | Vagina | HPV144 (1),HPV153 (3),HPV21 (1),HPV74 (2),HPV88 (1)        |
| 158458797 | SRS011111 | SRR062046 | Posterior fornix     | Vagina | HPV142 (5),HPV153 (1),HPV21 (1)                            |
| 158458797 | SRS011111 | SRR062096 | Posterior fornix     | Vagina | HPV121 (1),HPV144 (1),HPV153 (1),HPV74 (1),HPV88 (1),N (1) |
| 158479027 | SRS011084 | SRR062103 | Gut                  | Gut    |                                                            |
| 158479027 | SRS011084 | SRR061903 | Gut                  | Gut    |                                                            |
| 158479027 | SRS011084 | SRR061904 | Gut                  | Gut    |                                                            |
| 158479027 | SRS011084 | SRR062102 | Gut                  | Gut    |                                                            |
| 158479027 | SRS011115 | SRR062069 | Tongue dorsum        | Mouth  |                                                            |
| 158479027 | SRS011115 | SRR062068 | Tongue dorsum        | Mouth  |                                                            |
| 158479027 | SRS011126 | SRR062056 | Supragingival plaque | Mouth  |                                                            |
| 158479027 | SRS011126 | SRR062013 | Supragingival plaque | Mouth  |                                                            |
| 158479027 | SRS011126 | SRR062014 | Supragingival plaque | Mouth  |                                                            |
| 158479027 | SRS011126 | SRR062055 | Supragingival plaque | Mouth  |                                                            |
| 158479027 | SRS011132 | SRR061908 | Anterior nares       | Skin   | HPV120 (1),HPV12 (1)                                       |
| 158479027 | SRS011132 | SRR061907 | Anterior nares       | Skin   |                                                            |
| 158479027 | SRS021473 | SRR062079 | Buccal mucosa        | Mouth  |                                                            |
| 158479027 | SRS021473 | SRR060422 | Buccal mucosa        | Mouth  |                                                            |
| 158479027 | SRS021473 | SRR060423 | Buccal mucosa        | Mouth  |                                                            |
| 158479027 | SRS021473 | SRR062078 | Buccal mucosa        | Mouth  |                                                            |
| 158479027 | SRS021477 | SRR060425 | Supragingival plaque | Mouth  |                                                            |
| 158479027 | SRS021477 | SRR060424 | Supragingival plaque | Mouth  |                                                            |
| 158479027 | SRS021483 | SRR059837 | Anterior nares       | Skin   | HPV110 (2),HPV120 (29),HPV8 (1)                            |
| 158479027 | SRS021483 | SRR059836 | Anterior nares       | Skin   | HPV120 (33),HPV38 (1)                                      |

|           |           |           |                      |        |           |
|-----------|-----------|-----------|----------------------|--------|-----------|
| 158479027 | SRS021484 | SRR059853 | Gut                  | Gut    |           |
| 158479027 | SRS021484 | SRR059852 | Gut                  | Gut    |           |
| 158479027 | SRS021496 | SRR060379 | Tongue dorsum        | Mouth  | HPV38 (1) |
| 158479027 | SRS021496 | SRR060378 | Tongue dorsum        | Mouth  |           |
| 158499257 | SRS011134 | SRR060443 | Gut                  | Gut    |           |
| 158499257 | SRS011134 | SRR060442 | Gut                  | Gut    |           |
| 158499257 | SRS011140 | SRR062054 | Tongue dorsum        | Mouth  |           |
| 158499257 | SRS011140 | SRR062053 | Tongue dorsum        | Mouth  |           |
| 158499257 | SRS011144 | SRR062032 | Buccal mucosa        | Mouth  | HPV9 (1)  |
| 158499257 | SRS011144 | SRR062031 | Buccal mucosa        | Mouth  |           |
| 158499257 | SRS011152 | SRR061912 | Supragingival plaque | Mouth  | HPV12 (1) |
| 158499257 | SRS011152 | SRR061911 | Supragingival plaque | Mouth  | N (1)     |
| 158499257 | SRS022602 | SRR059909 | Supragingival plaque | Mouth  |           |
| 158499257 | SRS022602 | SRR059908 | Supragingival plaque | Mouth  |           |
| 158499257 | SRS022609 | SRR060353 | Gut                  | Gut    |           |
| 158499257 | SRS022609 | SRR060352 | Gut                  | Gut    |           |
| 158499257 | SRS022621 | SRR059893 | Tongue dorsum        | Mouth  |           |
| 158499257 | SRS022621 | SRR059892 | Tongue dorsum        | Mouth  |           |
| 158499257 | SRS022625 | SRR061966 | Buccal mucosa        | Mouth  |           |
| 158499257 | SRS022625 | SRR061965 | Buccal mucosa        | Mouth  |           |
| 158499257 | SRS022645 | SRR060383 | Anterior nares       | Skin   |           |
| 158499257 | SRS022645 | SRR060382 | Anterior nares       | Skin   |           |
| 158742018 | SRS011239 | SRR059855 | Gut                  | Gut    |           |
| 158742018 | SRS011239 | SRR059854 | Gut                  | Gut    |           |
| 158742018 | SRS011243 | SRR060417 | Tongue dorsum        | Mouth  |           |
| 158742018 | SRS011243 | SRR060416 | Tongue dorsum        | Mouth  |           |
| 158742018 | SRS011247 | SRR060401 | Buccal mucosa        | Mouth  |           |
| 158742018 | SRS011247 | SRR060400 | Buccal mucosa        | Mouth  |           |
| 158742018 | SRS011255 | SRR059919 | Supragingival plaque | Mouth  |           |
| 158742018 | SRS011255 | SRR059918 | Supragingival plaque | Mouth  |           |
| 158742018 | SRS011263 | SRR060439 | Anterior nares       | Skin   |           |
| 158742018 | SRS011263 | SRR060438 | Anterior nares       | Skin   |           |
| 158742018 | SRS011269 | SRR060413 | Posterior fornix     | Vagina |           |
| 158742018 | SRS011269 | SRR060412 | Posterior fornix     | Vagina |           |
| 158802708 | SRS011271 | SRR061170 | Gut                  | Gut    |           |
| 158802708 | SRS011271 | SRR061168 | Gut                  | Gut    |           |
| 158802708 | SRS023526 | SRR059417 | Gut                  | Gut    |           |
| 158802708 | SRS023526 | SRR059416 | Gut                  | Gut    |           |
| 158802708 | SRS023534 | SRR059419 | Buccal mucosa        | Mouth  |           |
| 158802708 | SRS023534 | SRR059418 | Buccal mucosa        | Mouth  |           |
| 158802708 | SRS023538 | SRR059899 | Supragingival plaque | Mouth  |           |

|           |           |           |                      |        |                  |
|-----------|-----------|-----------|----------------------|--------|------------------|
| 158802708 | SRS023538 | SRR059898 | Supragingival plaque | Mouth  |                  |
| 158802708 | SRS023557 | SRR061956 | Tongue dorsum        | Mouth  |                  |
| 158802708 | SRS023557 | SRR061955 | Tongue dorsum        | Mouth  |                  |
| 158883629 | SRS012902 | SRR059421 | Gut                  | Gut    |                  |
| 158883629 | SRS012902 | SRR059420 | Gut                  | Gut    |                  |
| 158883629 | SRS023829 | SRR061932 | Gut                  | Gut    |                  |
| 158883629 | SRS023829 | SRR061931 | Gut                  | Gut    |                  |
| 158883629 | SRS023835 | SRR060447 | Tongue dorsum        | Mouth  |                  |
| 158883629 | SRS023835 | SRR060446 | Tongue dorsum        | Mouth  |                  |
| 158883629 | SRS023837 | SRR060449 | Buccal mucosa        | Mouth  |                  |
| 158883629 | SRS023837 | SRR060448 | Buccal mucosa        | Mouth  |                  |
| 158883629 | SRS023841 | SRR061916 | Supragingival plaque | Mouth  |                  |
| 158883629 | SRS023841 | SRR061915 | Supragingival plaque | Mouth  |                  |
| 158883629 | SRS023847 | SRR061942 | Anterior nares       | Skin   | HPV148 (1)       |
| 158883629 | SRS023847 | SRR061941 | Anterior nares       | Skin   |                  |
| 158883629 | SRS023850 | SRR061918 | Posterior fornix     | Vagina | HPV91 (8)        |
| 158883629 | SRS023850 | SRR061917 | Posterior fornix     | Vagina | HPV91 (5)        |
| 158883629 | SRS075398 | SRR063921 | Gut                  | Gut    |                  |
| 158883629 | SRS075398 | SRR063915 | Gut                  | Gut    |                  |
| 158883629 | SRS075404 | SRR063928 | Tongue dorsum        | Mouth  |                  |
| 158883629 | SRS075404 | SRR063910 | Tongue dorsum        | Mouth  |                  |
| 158883629 | SRS075404 | SRR063913 | Tongue dorsum        | Mouth  |                  |
| 158883629 | SRS075404 | SRR063914 | Tongue dorsum        | Mouth  |                  |
| 158883629 | SRS075406 | SRR063922 | Buccal mucosa        | Mouth  |                  |
| 158883629 | SRS075406 | SRR063916 | Buccal mucosa        | Mouth  |                  |
| 158883629 | SRS075410 | SRR063926 | Supragingival plaque | Mouth  |                  |
| 158883629 | SRS075410 | SRR063918 | Supragingival plaque | Mouth  | HPV138 (1),N (1) |
| 158883629 | SRS075410 | SRR063919 | Supragingival plaque | Mouth  | HPV17 (1)        |
| 158883629 | SRS075410 | SRR063923 | Supragingival plaque | Mouth  | HPV17 (1)        |
| 158883629 | SRS075419 | SRR063924 | Posterior fornix     | Vagina | HPV91 (3)        |
| 158883629 | SRS075419 | SRR063911 | Posterior fornix     | Vagina | HPV91 (4)        |
| 158924089 | SRS023176 | SRR059901 | Gut                  | Gut    |                  |
| 158924089 | SRS023176 | SRR059900 | Gut                  | Gut    |                  |
| 158924089 | SRS023212 | SRR062094 | Anterior nares       | Skin   | HPV124 (1),N (1) |
| 158924089 | SRS023212 | SRR062037 | Anterior nares       | Skin   |                  |
| 158924089 | SRS023212 | SRR062038 | Anterior nares       | Skin   |                  |
| 158944319 | SRS011302 | SRR060411 | Gut                  | Gut    |                  |
| 158944319 | SRS011302 | SRR060410 | Gut                  | Gut    |                  |
| 158944319 | SRS011306 | SRR059929 | Tongue dorsum        | Mouth  |                  |
| 158944319 | SRS011306 | SRR059928 | Tongue dorsum        | Mouth  |                  |
| 158944319 | SRS011310 | SRR062050 | Buccal mucosa        | Mouth  | HPV8 (1)         |

|           |           |           |                      |        |                                                     |
|-----------|-----------|-----------|----------------------|--------|-----------------------------------------------------|
| 158944319 | SRS011310 | SRR059324 | Buccal mucosa        | Mouth  |                                                     |
| 158944319 | SRS011310 | SRR059325 | Buccal mucosa        | Mouth  |                                                     |
| 158944319 | SRS011310 | SRR062049 | Buccal mucosa        | Mouth  |                                                     |
| 158944319 | SRS011343 | SRR060421 | Supragingival plaque | Mouth  |                                                     |
| 158944319 | SRS011343 | SRR060420 | Supragingival plaque | Mouth  |                                                     |
| 158944319 | SRS011355 | SRR062073 | Posterior fornix     | Vagina | HPV43 (112),HPV45 (276),HPV53 (427)                 |
| 158944319 | SRS011355 | SRR060392 | Posterior fornix     | Vagina | HPV43 (157),HPV45 (443),HPV53 (573),HPV61 (1),N (3) |
| 158944319 | SRS011355 | SRR060393 | Posterior fornix     | Vagina | HPV43 (147),HPV45 (413),HPV53 (563),N (5)           |
| 158944319 | SRS011355 | SRR062072 | Posterior fornix     | Vagina | HPV43 (126),HPV45 (352),HPV53 (470),N (2)           |
| 158944319 | SRS024265 | SRR060369 | Gut                  | Gut    |                                                     |
| 158944319 | SRS024265 | SRR060368 | Gut                  | Gut    |                                                     |
| 158944319 | SRS024277 | SRR060409 | Tongue dorsum        | Mouth  |                                                     |
| 158944319 | SRS024277 | SRR060408 | Tongue dorsum        | Mouth  |                                                     |
| 158944319 | SRS024281 | SRR062107 | Buccal mucosa        | Mouth  |                                                     |
| 158944319 | SRS024281 | SRR060418 | Buccal mucosa        | Mouth  |                                                     |
| 158944319 | SRS024281 | SRR060419 | Buccal mucosa        | Mouth  |                                                     |
| 158944319 | SRS024281 | SRR062106 | Buccal mucosa        | Mouth  |                                                     |
| 158944319 | SRS024289 | SRR060407 | Supragingival plaque | Mouth  |                                                     |
| 158944319 | SRS024289 | SRR060406 | Supragingival plaque | Mouth  |                                                     |
| 158944319 | SRS024301 | SRR060415 | Anterior nares       | Skin   |                                                     |
| 158944319 | SRS024301 | SRR060414 | Anterior nares       | Skin   |                                                     |
| 158944319 | SRS024310 | SRR062075 | Posterior fornix     | Vagina | HPV53 (1)                                           |
| 158944319 | SRS024310 | SRR060394 | Posterior fornix     | Vagina |                                                     |
| 158944319 | SRS024310 | SRR060395 | Posterior fornix     | Vagina | HPV53 (3)                                           |
| 158944319 | SRS024310 | SRR062074 | Posterior fornix     | Vagina | HPV53 (1)                                           |
| 158984779 | SRS011397 | SRR060403 | Anterior nares       | Skin   | HPV98 (1)                                           |
| 158984779 | SRS011397 | SRR060402 | Anterior nares       | Skin   | HPV98 (1)                                           |
| 159005010 | SRS023583 | SRR059423 | Gut                  | Gut    |                                                     |
| 159005010 | SRS023583 | SRR059422 | Gut                  | Gut    |                                                     |
| 159005010 | SRS023591 | SRR059921 | Buccal mucosa        | Mouth  |                                                     |
| 159005010 | SRS023591 | SRR059920 | Buccal mucosa        | Mouth  |                                                     |
| 159005010 | SRS023617 | SRR062071 | Tongue dorsum        | Mouth  |                                                     |
| 159005010 | SRS023617 | SRR060390 | Tongue dorsum        | Mouth  |                                                     |
| 159005010 | SRS023617 | SRR060391 | Tongue dorsum        | Mouth  |                                                     |
| 159005010 | SRS023617 | SRR062070 | Tongue dorsum        | Mouth  |                                                     |
| 159146620 | SRS011452 | SRR062428 | Gut                  | Gut    |                                                     |
| 159146620 | SRS011452 | SRR062426 | Gut                  | Gut    |                                                     |
| 159166850 | SRS011529 | SRR061173 | Gut                  | Gut    | HPV47 (1)                                           |
| 159166850 | SRS011529 | SRR061153 | Gut                  | Gut    | HPV47 (2)                                           |
| 159207311 | SRS013476 | SRR059505 | Gut                  | Gut    |                                                     |

|           |           |           |                      |        |            |
|-----------|-----------|-----------|----------------------|--------|------------|
| 159207311 | SRS013476 | SRR059504 | Gut                  | Gut    |            |
| 159207311 | SRS013502 | SRR061954 | Tongue dorsum        | Mouth  |            |
| 159207311 | SRS013502 | SRR061953 | Tongue dorsum        | Mouth  |            |
| 159207311 | SRS013506 | SRR062040 | Buccal mucosa        | Mouth  |            |
| 159207311 | SRS013506 | SRR062039 | Buccal mucosa        | Mouth  |            |
| 159207311 | SRS013637 | SRR062087 | Anterior nares       | Skin   |            |
| 159207311 | SRS013637 | SRR059502 | Anterior nares       | Skin   |            |
| 159207311 | SRS013637 | SRR059503 | Anterior nares       | Skin   |            |
| 159207311 | SRS013637 | SRR062086 | Anterior nares       | Skin   |            |
| 159207311 | SRS017304 | SRR061936 | Supragingival plaque | Mouth  |            |
| 159207311 | SRS017304 | SRR061935 | Supragingival plaque | Mouth  |            |
| 159207311 | SRS024132 | SRR059507 | Gut                  | Gut    |            |
| 159207311 | SRS024132 | SRR059506 | Gut                  | Gut    |            |
| 159207311 | SRS024138 | SRR059509 | Tongue dorsum        | Mouth  |            |
| 159207311 | SRS024138 | SRR059508 | Tongue dorsum        | Mouth  |            |
| 159207311 | SRS024140 | SRR059369 | Buccal mucosa        | Mouth  |            |
| 159207311 | SRS024140 | SRR059368 | Buccal mucosa        | Mouth  |            |
| 159207311 | SRS024144 | SRR059371 | Supragingival plaque | Mouth  |            |
| 159207311 | SRS024144 | SRR059370 | Supragingival plaque | Mouth  |            |
| 159227541 | SRS013521 | SRR059813 | Gut                  | Gut    |            |
| 159227541 | SRS013521 | SRR059812 | Gut                  | Gut    |            |
| 159227541 | SRS013533 | SRR059815 | Supragingival plaque | Mouth  |            |
| 159227541 | SRS013533 | SRR059814 | Supragingival plaque | Mouth  |            |
| 159227541 | SRS013542 | SRR059817 | Posterior fornix     | Vagina | HPV66 (12) |
| 159227541 | SRS013542 | SRR059816 | Posterior fornix     | Vagina | HPV66 (4)  |
| 159227541 | SRS049147 | SRR059989 | Tongue dorsum        | Mouth  |            |
| 159227541 | SRS049147 | SRR059988 | Tongue dorsum        | Mouth  |            |
| 159227541 | SRS049995 | SRR059985 | Gut                  | Gut    |            |
| 159227541 | SRS049995 | SRR059984 | Gut                  | Gut    |            |
| 159227541 | SRS052756 | SRR059987 | Posterior fornix     | Vagina |            |
| 159227541 | SRS052756 | SRR059986 | Posterior fornix     | Vagina |            |
| 159227541 | SRS078176 | SRR060001 | Gut                  | Gut    |            |
| 159227541 | SRS078176 | SRR060000 | Gut                  | Gut    |            |
| 159227541 | SRS078182 | SRR061735 | Tongue dorsum        | Mouth  |            |
| 159227541 | SRS078182 | SRR061734 | Tongue dorsum        | Mouth  |            |
| 159227541 | SRS078197 | SRR064531 | Posterior fornix     | Vagina |            |
| 159227541 | SRS078197 | SRR061736 | Posterior fornix     | Vagina |            |
| 159227541 | SRS078197 | SRR061737 | Posterior fornix     | Vagina |            |
| 159227541 | SRS078197 | SRR064530 | Posterior fornix     | Vagina |            |
| 159247771 | SRS011405 | SRR061166 | Gut                  | Gut    |            |
| 159247771 | SRS011405 | SRR061164 | Gut                  | Gut    |            |

|           |           |           |                      |        |                             |
|-----------|-----------|-----------|----------------------|--------|-----------------------------|
| 159247771 | SRS011584 | SRR062483 | Posterior fornix     | Vagina |                             |
| 159247771 | SRS011584 | SRR062434 | Posterior fornix     | Vagina |                             |
| 159247771 | SRS024009 | SRR059461 | Gut                  | Gut    |                             |
| 159247771 | SRS024017 | SRR059833 | Buccal mucosa        | Mouth  |                             |
| 159247771 | SRS024017 | SRR059832 | Buccal mucosa        | Mouth  |                             |
| 159247771 | SRS024021 | SRR059433 | Supragingival plaque | Mouth  |                             |
| 159247771 | SRS024021 | SRR059432 | Supragingival plaque | Mouth  |                             |
| 159247771 | SRS024064 | SRR062008 | Anterior nares       | Skin   | HPV134 (1),HPV149 (1),N (1) |
| 159247771 | SRS024064 | SRR062007 | Anterior nares       | Skin   | HPV8 (1)                    |
| 159247771 | SRS024068 | SRR059435 | Posterior fornix     | Vagina |                             |
| 159247771 | SRS024068 | SRR059434 | Posterior fornix     | Vagina |                             |
| 159268001 | SRS013687 | SRR060375 | Gut                  | Gut    |                             |
| 159268001 | SRS013687 | SRR060374 | Gut                  | Gut    |                             |
| 159268001 | SRS013705 | SRR060361 | Tongue dorsum        | Mouth  |                             |
| 159268001 | SRS013705 | SRR060360 | Tongue dorsum        | Mouth  |                             |
| 159268001 | SRS013711 | SRR062010 | Buccal mucosa        | Mouth  | HPV98 (1)                   |
| 159268001 | SRS013711 | SRR062009 | Buccal mucosa        | Mouth  | HPV155 (1)                  |
| 159268001 | SRS013723 | SRR059889 | Supragingival plaque | Mouth  |                             |
| 159268001 | SRS013723 | SRR059888 | Supragingival plaque | Mouth  |                             |
| 159268001 | SRS023914 | SRR060363 | Gut                  | Gut    |                             |
| 159268001 | SRS023914 | SRR060362 | Gut                  | Gut    |                             |
| 159268001 | SRS023926 | SRR060387 | Tongue dorsum        | Mouth  |                             |
| 159268001 | SRS023926 | SRR060386 | Tongue dorsum        | Mouth  |                             |
| 159268001 | SRS023930 | SRR061962 | Buccal mucosa        | Mouth  |                             |
| 159268001 | SRS023930 | SRR061961 | Buccal mucosa        | Mouth  |                             |
| 159268001 | SRS023938 | SRR060355 | Supragingival plaque | Mouth  |                             |
| 159268001 | SRS023938 | SRR060354 | Supragingival plaque | Mouth  |                             |
| 159369152 | SRS013158 | SRR059897 | Gut                  | Gut    |                             |
| 159369152 | SRS013158 | SRR059896 | Gut                  | Gut    |                             |
| 159369152 | SRS013164 | SRR059849 | Tongue dorsum        | Mouth  |                             |
| 159369152 | SRS013164 | SRR059848 | Tongue dorsum        | Mouth  |                             |
| 159369152 | SRS013170 | SRR059867 | Supragingival plaque | Mouth  |                             |
| 159369152 | SRS013170 | SRR059866 | Supragingival plaque | Mouth  |                             |
| 159369152 | SRS023958 | SRR059851 | Tongue dorsum        | Mouth  |                             |
| 159369152 | SRS023958 | SRR059850 | Tongue dorsum        | Mouth  |                             |
| 159369152 | SRS023964 | SRR059869 | Supragingival plaque | Mouth  |                             |
| 159369152 | SRS023964 | SRR059868 | Supragingival plaque | Mouth  |                             |
| 159369152 | SRS023970 | SRR059879 | Anterior nares       | Skin   |                             |
| 159369152 | SRS023970 | SRR059878 | Anterior nares       | Skin   |                             |
| 159369152 | SRS023971 | SRR059911 | Gut                  | Gut    |                             |



|           |           |           |                         |       |                                                                                            |
|-----------|-----------|-----------|-------------------------|-------|--------------------------------------------------------------------------------------------|
| 159369152 | SRS023971 | SRR059910 | Gut                     | Gut   |                                                                                            |
| 159369152 | SRS023987 | SRR062028 | Buccal mucosa           | Mouth | HPV148 (1)                                                                                 |
| 159369152 | SRS023987 | SRR062027 | Buccal mucosa           | Mouth |                                                                                            |
| 159450072 | SRS016944 | SRR062061 | L_Retroauricular crease | Skin  |                                                                                            |
| 159450072 | SRS016944 | SRR062021 | L_Retroauricular crease | Skin  |                                                                                            |
| 159450072 | SRS016944 | SRR062022 | L_Retroauricular crease | Skin  |                                                                                            |
| 159450072 | SRS016944 | SRR062060 | L_Retroauricular crease | Skin  |                                                                                            |
| 159490532 | SRS016989 | SRR059373 | Gut                     | Gut   |                                                                                            |
| 159490532 | SRS016989 | SRR059372 | Gut                     | Gut   |                                                                                            |
| 159490532 | SRS016990 | SRR063900 | Gut                     | Gut   |                                                                                            |
| 159490532 | SRS016990 | SRR063899 | Gut                     | Gut   |                                                                                            |
| 159490532 | SRS017007 | SRR062081 | Tongue dorsum           | Mouth |                                                                                            |
| 159490532 | SRS017007 | SRR059374 | Tongue dorsum           | Mouth |                                                                                            |
| 159490532 | SRS017007 | SRR059375 | Tongue dorsum           | Mouth |                                                                                            |
| 159490532 | SRS017007 | SRR062080 | Tongue dorsum           | Mouth |                                                                                            |
| 159490532 | SRS017013 | SRR059895 | Buccal mucosa           | Mouth |                                                                                            |
| 159490532 | SRS017013 | SRR059894 | Buccal mucosa           | Mouth |                                                                                            |
| 159490532 | SRS017025 | SRR059329 | Supragingival plaque    | Mouth |                                                                                            |
| 159490532 | SRS017025 | SRR059328 | Supragingival plaque    | Mouth |                                                                                            |
| 159490532 | SRS017044 | SRR061914 | Anterior nares          | Skin  | HPV12 (1),HPV19 (15)                                                                       |
| 159490532 | SRS017044 | SRR061913 | Anterior nares          | Skin  | HPV19 (14),HPV28 (2)                                                                       |
| 159490532 | SRS044474 | SRR062026 | Anterior nares          | Skin  | HPV12 (2),HPV142 (1),HPV17 (1),HPV19 (2),HPV88 (1),N (1)                                   |
| 159490532 | SRS044474 | SRR062025 | Anterior nares          | Skin  | HPV119 (3),HPV134 (1),HPV147 (1),HPV19 (4),N (1)                                           |
| 159490532 | SRS046686 | SRR059335 | Buccal mucosa           | Mouth |                                                                                            |
| 159490532 | SRS046686 | SRR059334 | Buccal mucosa           | Mouth |                                                                                            |
| 159490532 | SRS052027 | SRR059331 | Gut                     | Gut   |                                                                                            |
| 159490532 | SRS052027 | SRR059330 | Gut                     | Gut   |                                                                                            |
| 159490532 | SRS054430 | SRR059337 | Supragingival plaque    | Mouth |                                                                                            |
| 159490532 | SRS054430 | SRR059336 | Supragingival plaque    | Mouth |                                                                                            |
| 159490532 | SRS055495 | SRR059333 | Tongue dorsum           | Mouth |                                                                                            |
| 159490532 | SRS055495 | SRR059332 | Tongue dorsum           | Mouth |                                                                                            |
| 159490532 | SRS058182 | SRR061928 | R_Retroauricular crease | Skin  | HPV112 (2),HPV130 (1),HPV48 (4),HPV4 (1),HPV60 (1),HPV76 (2),N (3)                         |
| 159490532 | SRS058182 | SRR061927 | R_Retroauricular crease | Skin  | HPV112 (1),HPV116 (2),HPV130 (1),HPV136 (1),HPV137 (1),HPV34 (1),HPV60 (2),HPV76 (1),N (2) |
| 159510762 | SRS017247 | SRR059829 | Gut                     | Gut   |                                                                                            |
| 159510762 | SRS017247 | SRR059828 | Gut                     | Gut   |                                                                                            |
| 159510762 | SRS024075 | SRR061691 | Gut                     | Gut   |                                                                                            |

|           |           |           |                      |       |                     |
|-----------|-----------|-----------|----------------------|-------|---------------------|
| 159510762 | SRS024075 | SRR061689 | Gut                  | Gut   |                     |
| 159510762 | SRS024075 | SRR061690 | Gut                  | Gut   |                     |
| 159510762 | SRS024081 | SRR060076 | Tongue dorsum        | Mouth |                     |
| 159510762 | SRS024081 | SRR060075 | Tongue dorsum        | Mouth |                     |
| 159510762 | SRS024087 | SRR059965 | Supragingival plaque | Mouth | HPV126 (1)          |
| 159510762 | SRS024087 | SRR059964 | Supragingival plaque | Mouth |                     |
| 159510762 | SRS063035 | SRR059997 | Anterior nares       | Skin  |                     |
| 159510762 | SRS063035 | SRR059996 | Anterior nares       | Skin  | HPV37 (1),HPV38 (1) |
| 159510762 | SRS063932 | SRR060120 | Tongue dorsum        | Mouth |                     |
| 159510762 | SRS063932 | SRR060119 | Tongue dorsum        | Mouth | HPV26 (1)           |
| 159510762 | SRS064329 | SRR060122 | Supragingival plaque | Mouth |                     |
| 159510762 | SRS064329 | SRR060121 | Supragingival plaque | Mouth |                     |
| 159551223 | SRS017103 | SRR060365 | Gut                  | Gut   |                     |
| 159551223 | SRS017103 | SRR060364 | Gut                  | Gut   |                     |
| 159551223 | SRS017120 | SRR059883 | Tongue dorsum        | Mouth |                     |
| 159551223 | SRS017120 | SRR059882 | Tongue dorsum        | Mouth |                     |
| 159551223 | SRS017127 | SRR061946 | Buccal mucosa        | Mouth | HPV50 (1)           |
| 159551223 | SRS017127 | SRR061945 | Buccal mucosa        | Mouth | HPV20 (1)           |
| 159551223 | SRS017139 | SRR059903 | Supragingival plaque | Mouth |                     |
| 159551223 | SRS017139 | SRR059902 | Supragingival plaque | Mouth |                     |
| 159551223 | SRS017156 | SRR059863 | Anterior nares       | Skin  |                     |
| 159551223 | SRS017156 | SRR059862 | Anterior nares       | Skin  |                     |
| 159551223 | SRS024318 | SRR060351 | Tongue dorsum        | Mouth |                     |
| 159551223 | SRS024318 | SRR060350 | Tongue dorsum        | Mouth |                     |
| 159551223 | SRS024331 | SRR059891 | Gut                  | Gut   |                     |
| 159551223 | SRS024331 | SRR059890 | Gut                  | Gut   |                     |
| 159551223 | SRS024347 | SRR061970 | Buccal mucosa        | Mouth |                     |
| 159551223 | SRS024347 | SRR061969 | Buccal mucosa        | Mouth |                     |
| 159551223 | SRS024355 | SRR059865 | Supragingival plaque | Mouth |                     |
| 159551223 | SRS024355 | SRR059864 | Supragingival plaque | Mouth |                     |
| 159571453 | SRS013155 | SRR059858 | Anterior nares       | Skin  |                     |
| 159571453 | SRS013800 | SRR059339 | Gut                  | Gut   |                     |
| 159571453 | SRS013800 | SRR059338 | Gut                  | Gut   |                     |
| 159571453 | SRS013818 | SRR059835 | Tongue dorsum        | Mouth |                     |
| 159571453 | SRS013818 | SRR059834 | Tongue dorsum        | Mouth |                     |
| 159571453 | SRS013825 | SRR061976 | Buccal mucosa        | Mouth |                     |
| 159571453 | SRS013825 | SRR061975 | Buccal mucosa        | Mouth |                     |
| 159571453 | SRS013836 | SRR059341 | Supragingival plaque | Mouth |                     |
| 159571453 | SRS013836 | SRR059340 | Supragingival plaque | Mouth |                     |
| 159571453 | SRS024435 | SRR059343 | Gut                  | Gut   |                     |

|           |           |           |                         |       |                                                     |
|-----------|-----------|-----------|-------------------------|-------|-----------------------------------------------------|
| 159571453 | SRS024435 | SRR059342 | Gut                     | Gut   |                                                     |
| 159571453 | SRS024441 | SRR059361 | Tongue dorsum           | Mouth |                                                     |
| 159571453 | SRS024441 | SRR059360 | Tongue dorsum           | Mouth |                                                     |
| 159571453 | SRS024447 | SRR059363 | Supragingival plaque    | Mouth |                                                     |
| 159571453 | SRS024447 | SRR059362 | Supragingival plaque    | Mouth |                                                     |
| 159571453 | SRS024470 | SRR061978 | Buccal mucosa           | Mouth |                                                     |
| 159571453 | SRS024470 | SRR061977 | Buccal mucosa           | Mouth |                                                     |
| 159571453 | SRS024482 | SRR061948 | L_Retroauricular crease | Skin  | HPV142 (1),HPV17 (72),HPV19 (1)                     |
| 159571453 | SRS024482 | SRR061947 | L_Retroauricular crease | Skin  | HPV142 (1),HPV17 (70),HPV19 (1),HPV21 (1),HPV80 (1) |
| 159591683 | SRS013215 | SRR059367 | Gut                     | Gut   |                                                     |
| 159591683 | SRS013215 | SRR059366 | Gut                     | Gut   |                                                     |
| 159591683 | SRS013216 | SRR063802 | Gut                     | Gut   |                                                     |
| 159591683 | SRS013216 | SRR063801 | Gut                     | Gut   |                                                     |
| 159591683 | SRS013234 | SRR061940 | Tongue dorsum           | Mouth | HPV20 (1)                                           |
| 159591683 | SRS013234 | SRR061939 | Tongue dorsum           | Mouth | HPV135 (1),HPV147 (1)                               |
| 159591683 | SRS013239 | SRR059385 | Buccal mucosa           | Mouth |                                                     |
| 159591683 | SRS013239 | SRR059384 | Buccal mucosa           | Mouth |                                                     |
| 159591683 | SRS013252 | SRR061968 | Supragingival plaque    | Mouth |                                                     |
| 159591683 | SRS013252 | SRR061967 | Supragingival plaque    | Mouth |                                                     |
| 159591683 | SRS013258 | SRR063917 | L_Retroauricular crease | Skin  |                                                     |
| 159591683 | SRS013258 | SRR062108 | L_Retroauricular crease | Skin  |                                                     |
| 159591683 | SRS013261 | SRR062091 | R_Retroauricular crease | Skin  |                                                     |
| 159591683 | SRS013261 | SRR061995 | R_Retroauricular crease | Skin  | HPV5 (1)                                            |
| 159591683 | SRS013261 | SRR061996 | R_Retroauricular crease | Skin  |                                                     |
| 159591683 | SRS013261 | SRR062090 | R_Retroauricular crease | Skin  |                                                     |
| 159591683 | SRS013269 | SRR059365 | Anterior nares          | Skin  |                                                     |
| 159591683 | SRS013269 | SRR059364 | Anterior nares          | Skin  |                                                     |
| 159591683 | SRS024561 | SRR059409 | Supragingival plaque    | Mouth |                                                     |
| 159591683 | SRS024561 | SRR059408 | Supragingival plaque    | Mouth |                                                     |
| 159591683 | SRS024567 | SRR059386 | Anterior nares          | Skin  |                                                     |
| 159591683 | SRS024580 | SRR061998 | Tongue dorsum           | Mouth | HPV135 (1),HPV17 (3),HPV20 (1)                      |
| 159591683 | SRS024580 | SRR061997 | Tongue dorsum           | Mouth | HPV17 (2)                                           |
| 159591683 | SRS024596 | SRR062018 | L_Retroauricular crease | Skin  | HPV133 (1)                                          |
| 159591683 | SRS024596 | SRR062017 | L_Retroauricular crease | Skin  |                                                     |
| 159591683 | SRS024598 | SRR061922 | R_Retroauricular crease | Skin  | HPV15 (1),HPV80 (1)                                 |
| 159591683 | SRS024598 | SRR061921 | R_Retroauricular crease | Skin  |                                                     |

|           |           |           |                         |       |            |
|-----------|-----------|-----------|-------------------------|-------|------------|
| 159611913 | SRS016954 | SRR061920 | Gut                     | Gut   |            |
| 159611913 | SRS016954 | SRR061919 | Gut                     | Gut   |            |
| 159611913 | SRS017076 | SRR062095 | Tongue dorsum           | Mouth |            |
| 159611913 | SRS017076 | SRR060430 | Tongue dorsum           | Mouth |            |
| 159611913 | SRS017076 | SRR060431 | Tongue dorsum           | Mouth |            |
| 159611913 | SRS017080 | SRR062089 | Buccal mucosa           | Mouth |            |
| 159611913 | SRS017080 | SRR060434 | Buccal mucosa           | Mouth |            |
| 159611913 | SRS017080 | SRR060435 | Buccal mucosa           | Mouth |            |
| 159611913 | SRS017080 | SRR062088 | Buccal mucosa           | Mouth |            |
| 159611913 | SRS017088 | SRR062034 | Supragingival plaque    | Mouth |            |
| 159611913 | SRS017088 | SRR062033 | Supragingival plaque    | Mouth |            |
| 159611913 | SRS024620 | SRR059925 | L_Retroauricular crease | Skin  |            |
| 159611913 | SRS024620 | SRR059924 | L_Retroauricular crease | Skin  |            |
| 159611913 | SRS024625 | SRR061930 | Gut                     | Gut   |            |
| 159611913 | SRS024625 | SRR061929 | Gut                     | Gut   |            |
| 159611913 | SRS024637 | SRR060441 | Tongue dorsum           | Mouth |            |
| 159611913 | SRS024637 | SRR060440 | Tongue dorsum           | Mouth |            |
| 159611913 | SRS024641 | SRR062030 | Buccal mucosa           | Mouth |            |
| 159611913 | SRS024641 | SRR062029 | Buccal mucosa           | Mouth | HPV145 (1) |
| 159611913 | SRS024649 | SRR062101 | Supragingival plaque    | Mouth |            |
| 159611913 | SRS024649 | SRR061905 | Supragingival plaque    | Mouth |            |
| 159611913 | SRS024649 | SRR061906 | Supragingival plaque    | Mouth |            |
| 159611913 | SRS024649 | SRR062092 | Supragingival plaque    | Mouth |            |
| 159611913 | SRS024655 | SRR062006 | R_Retroauricular crease | Skin  | HPV149 (1) |
| 159611913 | SRS024655 | SRR062005 | R_Retroauricular crease | Skin  |            |
| 159632143 | SRS016342 | SRR059839 | Tongue dorsum           | Mouth |            |
| 159632143 | SRS016342 | SRR059838 | Tongue dorsum           | Mouth |            |
| 159632143 | SRS016349 | SRR061910 | Buccal mucosa           | Mouth |            |
| 159632143 | SRS016349 | SRR061909 | Buccal mucosa           | Mouth |            |
| 159632143 | SRS016360 | SRR060381 | Supragingival plaque    | Mouth |            |
| 159632143 | SRS016360 | SRR060380 | Supragingival plaque    | Mouth |            |
| 159632143 | SRS017307 | SRR059885 | Gut                     | Gut   |            |
| 159632143 | SRS017307 | SRR059884 | Gut                     | Gut   |            |
| 159672603 | SRS016434 | SRR061964 | Anterior nares          | Skin  |            |
| 159672603 | SRS016434 | SRR061963 | Anterior nares          | Skin  |            |
| 159713063 | SRS024375 | SRR059437 | Tongue dorsum           | Mouth |            |
| 159713063 | SRS024375 | SRR059436 | Tongue dorsum           | Mouth |            |
| 159713063 | SRS024377 | SRR059439 | Buccal mucosa           | Mouth |            |
| 159713063 | SRS024377 | SRR059438 | Buccal mucosa           | Mouth |            |

|           |           |           |                      |        |                     |
|-----------|-----------|-----------|----------------------|--------|---------------------|
| 159713063 | SRS024381 | SRR059841 | Supragingival plaque | Mouth  |                     |
| 159713063 | SRS024381 | SRR059840 | Supragingival plaque | Mouth  |                     |
| 159713063 | SRS024388 | SRR059345 | Gut                  | Gut    |                     |
| 159713063 | SRS024388 | SRR059344 | Gut                  | Gut    |                     |
| 159713063 | SRS024424 | SRR063927 | Anterior nares       | Skin   | HPV17 (3),HPV23 (1) |
| 159713063 | SRS024424 | SRR063925 | Anterior nares       | Skin   | HPV17 (5)           |
| 159733294 | SRS011586 | SRR061145 | Gut                  | Gut    |                     |
| 159733294 | SRS011586 | SRR061144 | Gut                  | Gut    |                     |
| 159753524 | SRS016495 | SRR060026 | Gut                  | Gut    |                     |
| 159753524 | SRS016495 | SRR060025 | Gut                  | Gut    |                     |
| 159753524 | SRS016501 | SRR061693 | Tongue dorsum        | Mouth  |                     |
| 159753524 | SRS016501 | SRR061692 | Tongue dorsum        | Mouth  |                     |
| 159753524 | SRS016503 | SRR059827 | Buccal mucosa        | Mouth  |                     |
| 159753524 | SRS016503 | SRR059826 | Buccal mucosa        | Mouth  |                     |
| 159753524 | SRS016513 | SRR060028 | Anterior nares       | Skin   |                     |
| 159753524 | SRS016513 | SRR060027 | Anterior nares       | Skin   |                     |
| 159753524 | SRS016516 | SRR059825 | Posterior fornix     | Vagina |                     |
| 159753524 | SRS016516 | SRR059824 | Posterior fornix     | Vagina |                     |
| 159753524 | SRS016517 | SRR061934 | Gut                  | Gut    |                     |
| 159753524 | SRS016517 | SRR061933 | Gut                  | Gut    |                     |
| 159753524 | SRS016529 | SRR062004 | Tongue dorsum        | Mouth  |                     |
| 159753524 | SRS016529 | SRR062003 | Tongue dorsum        | Mouth  |                     |
| 159753524 | SRS016533 | SRR061960 | Buccal mucosa        | Mouth  |                     |
| 159753524 | SRS016533 | SRR061959 | Buccal mucosa        | Mouth  |                     |
| 159753524 | SRS016541 | SRR060405 | Supragingival plaque | Mouth  |                     |
| 159753524 | SRS016541 | SRR060404 | Supragingival plaque | Mouth  |                     |
| 159753524 | SRS016553 | SRR060433 | Anterior nares       | Skin   |                     |
| 159753524 | SRS016553 | SRR060432 | Anterior nares       | Skin   |                     |
| 159753524 | SRS016559 | SRR060445 | Posterior fornix     | Vagina |                     |
| 159753524 | SRS016559 | SRR060444 | Posterior fornix     | Vagina |                     |
| 159753524 | SRS042858 | SRR060080 | Posterior fornix     | Vagina |                     |
| 159753524 | SRS042858 | SRR060079 | Posterior fornix     | Vagina |                     |
| 159753524 | SRS053214 | SRR059991 | Gut                  | Gut    |                     |
| 159753524 | SRS053214 | SRR059990 | Gut                  | Gut    |                     |
| 159753524 | SRS056157 | SRR060078 | Buccal mucosa        | Mouth  |                     |
| 159753524 | SRS056157 | SRR060077 | Buccal mucosa        | Mouth  |                     |
| 159753524 | SRS077730 | SRR060138 | Gut                  | Gut    |                     |
| 159753524 | SRS077730 | SRR060137 | Gut                  | Gut    |                     |
| 159753524 | SRS077736 | SRR061696 | Tongue dorsum        | Mouth  |                     |
| 159753524 | SRS077736 | SRR061694 | Tongue dorsum        | Mouth  |                     |
| 159753524 | SRS077736 | SRR061695 | Tongue dorsum        | Mouth  |                     |
| 159753524 | SRS077738 | SRR059999 | Buccal mucosa        | Mouth  |                     |

|           |           |           |                      |        |            |
|-----------|-----------|-----------|----------------------|--------|------------|
| 159753524 | SRS077738 | SRR059998 | Buccal mucosa        | Mouth  |            |
| 159753524 | SRS077751 | SRR060140 | Posterior fornix     | Vagina |            |
| 159753524 | SRS077751 | SRR060139 | Posterior fornix     | Vagina |            |
| 159814214 | SRS017191 | SRR060359 | Gut                  | Gut    |            |
| 159814214 | SRS017191 | SRR060358 | Gut                  | Gut    |            |
| 159814214 | SRS017209 | SRR062048 | Tongue dorsum        | Mouth  |            |
| 159814214 | SRS017209 | SRR059322 | Tongue dorsum        | Mouth  |            |
| 159814214 | SRS017209 | SRR059323 | Tongue dorsum        | Mouth  |            |
| 159814214 | SRS017209 | SRR062047 | Tongue dorsum        | Mouth  |            |
| 159814214 | SRS017215 | SRR062024 | Buccal mucosa        | Mouth  |            |
| 159814214 | SRS017215 | SRR062023 | Buccal mucosa        | Mouth  |            |
| 159814214 | SRS017227 | SRR059861 | Supragingival plaque | Mouth  |            |
| 159814214 | SRS017227 | SRR059860 | Supragingival plaque | Mouth  |            |
| 159814214 | SRS017244 | SRR060367 | Anterior nares       | Skin   | HPV110 (2) |
| 159814214 | SRS017244 | SRR060366 | Anterior nares       | Skin   | HPV149 (2) |
| 159814214 | SRS043422 | SRR062000 | Buccal mucosa        | Mouth  |            |
| 159814214 | SRS043422 | SRR061999 | Buccal mucosa        | Mouth  |            |
| 159814214 | SRS043701 | SRR059915 | Gut                  | Gut    |            |
| 159814214 | SRS043701 | SRR059914 | Gut                  | Gut    |            |
| 159814214 | SRS047113 | SRR061950 | Supragingival plaque | Mouth  |            |
| 159814214 | SRS047113 | SRR061949 | Supragingival plaque | Mouth  |            |
| 159814214 | SRS047225 | SRR061944 | Anterior nares       | Skin   |            |
| 159814214 | SRS047225 | SRR061943 | Anterior nares       | Skin   | HPV12 (3)  |
| 159814214 | SRS050669 | SRR059881 | Tongue dorsum        | Mouth  |            |
| 159814214 | SRS050669 | SRR059880 | Tongue dorsum        | Mouth  |            |
| 159915365 | SRS016584 | SRR062100 | Posterior fornix     | Vagina |            |
| 159915365 | SRS016584 | SRR062057 | Posterior fornix     | Vagina |            |
| 159915365 | SRS016585 | SRR059347 | Gut                  | Gut    |            |
| 159915365 | SRS016585 | SRR059346 | Gut                  | Gut    |            |
| 159915365 | SRS016600 | SRR062063 | Buccal mucosa        | Mouth  |            |
| 159915365 | SRS016600 | SRR061981 | Buccal mucosa        | Mouth  |            |
| 159915365 | SRS016600 | SRR061982 | Buccal mucosa        | Mouth  |            |
| 159915365 | SRS016600 | SRR062062 | Buccal mucosa        | Mouth  |            |
| 160158126 | SRS018133 | SRR061974 | Gut                  | Gut    |            |
| 160158126 | SRS018133 | SRR061973 | Gut                  | Gut    |            |
| 160158126 | SRS018145 | SRR060377 | Tongue dorsum        | Mouth  |            |
| 160158126 | SRS018145 | SRR060376 | Tongue dorsum        | Mouth  |            |
| 160158126 | SRS018149 | SRR062067 | Buccal mucosa        | Mouth  |            |
| 160158126 | SRS018149 | SRR062066 | Buccal mucosa        | Mouth  |            |
| 160158126 | SRS018157 | SRR061972 | Supragingival plaque | Mouth  |            |
| 160158126 | SRS018157 | SRR061971 | Supragingival plaque | Mouth  |            |

|           |           |           |                      |        |                                           |
|-----------|-----------|-----------|----------------------|--------|-------------------------------------------|
| 160158126 | SRS047634 | SRR060385 | Supragingival plaque | Mouth  |                                           |
| 160158126 | SRS047634 | SRR060384 | Supragingival plaque | Mouth  |                                           |
| 160158126 | SRS054569 | SRR059870 | Buccal mucosa        | Mouth  |                                           |
| 160158126 | SRS057692 | SRR059857 | Tongue dorsum        | Mouth  |                                           |
| 160158126 | SRS057692 | SRR059856 | Tongue dorsum        | Mouth  |                                           |
| 160158126 | SRS058770 | SRR060357 | Gut                  | Gut    |                                           |
| 160158126 | SRS058770 | SRR060356 | Gut                  | Gut    |                                           |
| 160178356 | SRS018359 | SRR062059 | Buccal mucosa        | Mouth  |                                           |
| 160178356 | SRS018359 | SRR062058 | Buccal mucosa        | Mouth  |                                           |
| 160178356 | SRS018369 | SRR059913 | Anterior nares       | Skin   |                                           |
| 160178356 | SRS018369 | SRR059912 | Anterior nares       | Skin   |                                           |
| 160178356 | SRS018394 | SRR062002 | Supragingival plaque | Mouth  |                                           |
| 160178356 | SRS018394 | SRR062001 | Supragingival plaque | Mouth  |                                           |
| 160218816 | SRS018427 | SRR059917 | Gut                  | Gut    |                                           |
| 160218816 | SRS018427 | SRR059916 | Gut                  | Gut    |                                           |
| 160218816 | SRS018439 | SRR059907 | Tongue dorsum        | Mouth  |                                           |
| 160218816 | SRS018439 | SRR059906 | Tongue dorsum        | Mouth  |                                           |
| 160218816 | SRS018443 | SRR062042 | Buccal mucosa        | Mouth  |                                           |
| 160218816 | SRS018443 | SRR062041 | Buccal mucosa        | Mouth  |                                           |
| 160218816 | SRS018463 | SRR059873 | Anterior nares       | Skin   |                                           |
| 160218816 | SRS018463 | SRR059872 | Anterior nares       | Skin   |                                           |
| 160319967 | SRS017433 | SRR059379 | Gut                  | Gut    |                                           |
| 160319967 | SRS017433 | SRR059378 | Gut                  | Gut    |                                           |
| 160319967 | SRS017439 | SRR059381 | Tongue dorsum        | Mouth  |                                           |
| 160319967 | SRS017439 | SRR059380 | Tongue dorsum        | Mouth  |                                           |
| 160319967 | SRS017441 | SRR059383 | Buccal mucosa        | Mouth  |                                           |
| 160319967 | SRS017441 | SRR059382 | Buccal mucosa        | Mouth  |                                           |
| 160319967 | SRS017445 | SRR062083 | Supragingival plaque | Mouth  |                                           |
| 160319967 | SRS017445 | SRR059844 | Supragingival plaque | Mouth  | HPV62 (1)                                 |
| 160319967 | SRS017445 | SRR059845 | Supragingival plaque | Mouth  |                                           |
| 160319967 | SRS017445 | SRR062082 | Supragingival plaque | Mouth  |                                           |
| 160319967 | SRS017451 | SRR059377 | Anterior nares       | Skin   | HPV4 (1)                                  |
| 160319967 | SRS017451 | SRR059376 | Anterior nares       | Skin   | HPV112 (1),HPV4 (2)                       |
| 160319967 | SRS017497 | SRR059349 | Posterior fornix     | Vagina | HPV51 (1),HPV62 (39),HPV68 (10),HPV83 (3) |
| 160319967 | SRS017497 | SRR059348 | Posterior fornix     | Vagina | HPV51 (1),HPV62 (27),HPV68 (9),HPV6 (1)   |
| 160380657 | SRS018313 | SRR062012 | Gut                  | Gut    |                                           |
| 160380657 | SRS018313 | SRR062011 | Gut                  | Gut    |                                           |
| 160380657 | SRS018329 | SRR062085 | Buccal mucosa        | Mouth  |                                           |
| 160380657 | SRS018329 | SRR062043 | Buccal mucosa        | Mouth  |                                           |
| 160380657 | SRS018329 | SRR062044 | Buccal mucosa        | Mouth  |                                           |

|           |           |           |                         |        |                                                                                 |
|-----------|-----------|-----------|-------------------------|--------|---------------------------------------------------------------------------------|
| 160380657 | SRS018329 | SRR062084 | Buccal mucosa           | Mouth  |                                                                                 |
| 160380657 | SRS018337 | SRR061980 | Supragingival plaque    | Mouth  |                                                                                 |
| 160380657 | SRS018337 | SRR061979 | Supragingival plaque    | Mouth  |                                                                                 |
| 160400887 | SRS020222 | SRR062099 | Buccal mucosa           | Mouth  | HPV144 (10)                                                                     |
| 160400887 | SRS020222 | SRR059488 | Buccal mucosa           | Mouth  |                                                                                 |
| 160400887 | SRS020222 | SRR059489 | Buccal mucosa           | Mouth  | HPV144 (8)                                                                      |
| 160400887 | SRS020222 | SRR062098 | Buccal mucosa           | Mouth  | HPV144 (10)                                                                     |
| 160400887 | SRS020226 | SRR059491 | Supragingival plaque    | Mouth  |                                                                                 |
| 160400887 | SRS020226 | SRR059490 | Supragingival plaque    | Mouth  |                                                                                 |
| 160400887 | SRS020233 | SRR059351 | Gut                     | Gut    |                                                                                 |
| 160400887 | SRS020233 | SRR059350 | Gut                     | Gut    | HPV47 (1)                                                                       |
| 160400887 | SRS020261 | SRR062020 | L_Retroauricular crease | Skin   | HPV107 (3),HPV127 (1),HPV12 (1),HPV17 (8),HPV98 (1),N (2)                       |
| 160400887 | SRS020261 | SRR062019 | L_Retroauricular crease | Skin   | HPV107 (5),HPV148 (1),HPV17 (6)                                                 |
| 160400887 | SRS020263 | SRR062016 | R_Retroauricular crease | Skin   | HPV107 (3),HPV115 (3),HPV121 (2),HPV124 (3),HPV12 (2),HPV17 (1),HPV60 (4),N (9) |
| 160400887 | SRS020263 | SRR062015 | R_Retroauricular crease | Skin   | HPV107 (2),HPV115 (4),HPV118 (1),HPV121 (1),HPV129 (1),HPV60 (11),N (12)        |
| 160421117 | SRS016740 | SRR059923 | Tongue dorsum           | Mouth  |                                                                                 |
| 160421117 | SRS016740 | SRR059922 | Tongue dorsum           | Mouth  |                                                                                 |
| 160421117 | SRS016746 | SRR059927 | Supragingival plaque    | Mouth  |                                                                                 |
| 160421117 | SRS016746 | SRR059926 | Supragingival plaque    | Mouth  |                                                                                 |
| 160421117 | SRS016752 | SRR060429 | Anterior nares          | Skin   | HPV118 (2),HPV122 (2),HPV22 (1),HPV98 (1)                                       |
| 160421117 | SRS016752 | SRR060428 | Anterior nares          | Skin   | HPV22 (3),HPV49 (1),HPV50 (1),HPV98 (1)                                         |
| 160421117 | SRS016753 | SRR059831 | Gut                     | Gut    |                                                                                 |
| 160421117 | SRS016753 | SRR059830 | Gut                     | Gut    |                                                                                 |
| 160502038 | SRS017511 | SRR059847 | Supragingival plaque    | Mouth  |                                                                                 |
| 160502038 | SRS017511 | SRR059846 | Supragingival plaque    | Mouth  |                                                                                 |
| 160502038 | SRS017520 | SRR060427 | Posterior fornix        | Vagina | HPV56 (66)                                                                      |
| 160502038 | SRS017520 | SRR060426 | Posterior fornix        | Vagina | HPV56 (43)                                                                      |
| 160502038 | SRS017521 | SRR059887 | Gut                     | Gut    | HPV58 (1)                                                                       |
| 160502038 | SRS017521 | SRR059886 | Gut                     | Gut    |                                                                                 |
| 160502038 | SRS017533 | SRR062065 | Tongue dorsum           | Mouth  |                                                                                 |
| 160502038 | SRS017533 | SRR062064 | Tongue dorsum           | Mouth  |                                                                                 |
| 160502038 | SRS017537 | SRR061952 | Buccal mucosa           | Mouth  |                                                                                 |
| 160502038 | SRS017537 | SRR061951 | Buccal mucosa           | Mouth  |                                                                                 |
| 160582958 | SRS017687 | SRR059905 | Buccal mucosa           | Mouth  |                                                                                 |
| 160582958 | SRS017687 | SRR059904 | Buccal mucosa           | Mouth  |                                                                                 |
| 160582958 | SRS017691 | SRR059493 | Supragingival plaque    | Mouth  |                                                                                 |



|           |           |           |                         |        |                                                   |
|-----------|-----------|-----------|-------------------------|--------|---------------------------------------------------|
| 160582958 | SRS017691 | SRR059492 | Supragingival plaque    | Mouth  |                                                   |
| 160582958 | SRS017697 | SRR059877 | Anterior nares          | Skin   | HPV4 (2)                                          |
| 160582958 | SRS017697 | SRR059876 | Anterior nares          | Skin   |                                                   |
| 160582958 | SRS017700 | SRR059495 | Posterior fornix        | Vagina |                                                   |
| 160582958 | SRS017700 | SRR059494 | Posterior fornix        | Vagina |                                                   |
| 160582958 | SRS017701 | SRR059353 | Gut                     | Gut    |                                                   |
| 160582958 | SRS017701 | SRR059352 | Gut                     | Gut    |                                                   |
| 160582958 | SRS017713 | SRR061938 | Tongue dorsum           | Mouth  |                                                   |
| 160582958 | SRS017713 | SRR061937 | Tongue dorsum           | Mouth  |                                                   |
| 160603188 | SRS017808 | SRR059403 | Tongue dorsum           | Mouth  |                                                   |
| 160603188 | SRS017810 | SRR059875 | Buccal mucosa           | Mouth  |                                                   |
| 160603188 | SRS017810 | SRR059874 | Buccal mucosa           | Mouth  |                                                   |
| 160603188 | SRS017814 | SRR060373 | Supragingival plaque    | Mouth  |                                                   |
| 160603188 | SRS017814 | SRR060372 | Supragingival plaque    | Mouth  |                                                   |
| 160603188 | SRS017821 | SRR059355 | Gut                     | Gut    |                                                   |
| 160603188 | SRS017821 | SRR059354 | Gut                     | Gut    |                                                   |
| 160603188 | SRS017849 | SRR061924 | L_Retroauricular crease | Skin   | HPV9 (31)                                         |
| 160603188 | SRS017849 | SRR061923 | L_Retroauricular crease | Skin   | HPV122 (1),HPV137 (1),HPV150 (1),HPV9 (116),N (3) |
| 160603188 | SRS017851 | SRR061926 | R_Retroauricular crease | Skin   | HPV150 (3)                                        |
| 160603188 | SRS017851 | SRR061925 | R_Retroauricular crease | Skin   | HPV150 (3),HPV17 (1),HPV20 (1)                    |
| 160643649 | SRS019968 | SRR059407 | Gut                     | Gut    |                                                   |
| 160643649 | SRS019968 | SRR059406 | Gut                     | Gut    |                                                   |
| 160643649 | SRS019974 | SRR059481 | Tongue dorsum           | Mouth  |                                                   |
| 160643649 | SRS019974 | SRR059480 | Tongue dorsum           | Mouth  |                                                   |
| 160643649 | SRS019976 | SRR059483 | Buccal mucosa           | Mouth  |                                                   |
| 160643649 | SRS019976 | SRR059482 | Buccal mucosa           | Mouth  |                                                   |
| 160643649 | SRS019980 | SRR059485 | Supragingival plaque    | Mouth  |                                                   |
| 160643649 | SRS019980 | SRR059484 | Supragingival plaque    | Mouth  |                                                   |
| 160643649 | SRS019986 | SRR059405 | Anterior nares          | Skin   | HPV120 (1),HPV45 (2),HPV65 (1),N (11)             |
| 160643649 | SRS019986 | SRR059404 | Anterior nares          | Skin   | HPV119 (1),HPV151 (1),HPV45 (1),N (6)             |
| 160643649 | SRS019989 | SRR059487 | Posterior fornix        | Vagina |                                                   |
| 160643649 | SRS019989 | SRR059486 | Posterior fornix        | Vagina |                                                   |
| 160704339 | SRS020328 | SRR059441 | Gut                     | Gut    | HPV47 (1)                                         |
| 160704339 | SRS020328 | SRR059440 | Gut                     | Gut    | HPV47 (3)                                         |
| 160704339 | SRS020334 | SRR059443 | Tongue dorsum           | Mouth  |                                                   |
| 160704339 | SRS020334 | SRR059442 | Tongue dorsum           | Mouth  |                                                   |
| 160704339 | SRS020336 | SRR059445 | Buccal mucosa           | Mouth  |                                                   |
| 160704339 | SRS020336 | SRR059444 | Buccal mucosa           | Mouth  |                                                   |
| 160704339 | SRS020340 | SRR059447 | Supragingival plaque    | Mouth  |                                                   |

|           |           |           |                         |        |                                                    |
|-----------|-----------|-----------|-------------------------|--------|----------------------------------------------------|
| 160704339 | SRS020340 | SRR059446 | Supragingival plaque    | Mouth  |                                                    |
| 160704339 | SRS020349 | SRR059497 | Posterior fornix        | Vagina |                                                    |
| 160704339 | SRS020349 | SRR059496 | Posterior fornix        | Vagina |                                                    |
| 160704339 | SRS020386 | SRR063920 | Anterior nares          | Skin   | HPV37 (1),HPV5 (66),HPV5b (2),N (3)                |
| 160704339 | SRS020386 | SRR061993 | Anterior nares          | Skin   | HPV143 (1),HPV5 (101),HPV5b (3),N (3)              |
| 160704339 | SRS020386 | SRR061994 | Anterior nares          | Skin   | HPV5 (103),HPV5b (3),N (4)                         |
| 160704339 | SRS020386 | SRR063912 | Anterior nares          | Skin   | HPV5 (79),HPV5b (1),N (5)                          |
| 160765029 | SRS020856 | SRR059501 | Tongue dorsum           | Mouth  |                                                    |
| 160765029 | SRS020856 | SRR059500 | Tongue dorsum           | Mouth  |                                                    |
| 160765029 | SRS020858 | SRR059359 | Buccal mucosa           | Mouth  |                                                    |
| 160765029 | SRS020858 | SRR059358 | Buccal mucosa           | Mouth  |                                                    |
| 160765029 | SRS020862 | SRR059843 | Supragingival plaque    | Mouth  |                                                    |
| 160765029 | SRS020862 | SRR059842 | Supragingival plaque    | Mouth  |                                                    |
| 160765029 | SRS020868 | SRR059499 | Anterior nares          | Skin   |                                                    |
| 160765029 | SRS020868 | SRR059498 | Anterior nares          | Skin   |                                                    |
| 160765029 | SRS020869 | SRR059357 | Gut                     | Gut    |                                                    |
| 160765029 | SRS020869 | SRR059356 | Gut                     | Gut    |                                                    |
| 160765029 | SRS020905 | SRR059519 | Anterior nares          | Skin   |                                                    |
| 160765029 | SRS020905 | SRR059518 | Anterior nares          | Skin   |                                                    |
| 246515023 | SRS023346 | SRR060006 | Gut                     | Gut    | HPV101 (1)                                         |
| 246515023 | SRS023352 | SRR060007 | Tongue dorsum           | Mouth  |                                                    |
| 246515023 | SRS023354 | SRR060037 | Buccal mucosa           | Mouth  |                                                    |
| 246515023 | SRS023358 | SRR060004 | Supragingival plaque    | Mouth  | HPV80 (1)                                          |
| 246515023 | SRS023468 | SRR060038 | Posterior fornix        | Vagina | HPV67 (1)                                          |
| 246515023 | SRS045715 | SRR060123 | Tongue dorsum           | Mouth  |                                                    |
| 246515023 | SRS049318 | SRR060142 | Supragingival plaque    | Mouth  |                                                    |
| 246515023 | SRS055298 | SRR060153 | Posterior fornix        | Vagina |                                                    |
| 246515023 | SRS057022 | SRR060141 | Buccal mucosa           | Mouth  |                                                    |
| 246515023 | SRS057717 | SRR059818 | Gut                     | Gut    | HPV68 (1)                                          |
| 338793263 | SRS045606 | SRR061415 | R_Retroauricular crease | Skin   | HPV112 (1),HPV38 (7),HPV42 (52)                    |
| 338793263 | SRS045606 | SRR061361 | R_Retroauricular crease | Skin   | HPV38 (5),HPV42 (56)                               |
| 338793263 | SRS050029 | SRR063476 | Buccal mucosa           | Mouth  |                                                    |
| 338793263 | SRS050029 | SRR063474 | Buccal mucosa           | Mouth  |                                                    |
| 338793263 | SRS051505 | SRR061560 | Posterior fornix        | Vagina | HPV42 (220),HPV61 (127),HPV62 (25),N (4)           |
| 338793263 | SRS051505 | SRR061552 | Posterior fornix        | Vagina | HPV42 (231),HPV61 (122),HPV62 (20),HPV72 (1),N (1) |
| 338793263 | SRS052227 | SRR063509 | Tongue dorsum           | Mouth  |                                                    |
| 338793263 | SRS052227 | SRR063508 | Tongue dorsum           | Mouth  |                                                    |
| 338793263 | SRS052604 | SRR061599 | Supragingival plaque    | Mouth  |                                                    |
| 338793263 | SRS052604 | SRR061580 | Supragingival           | Mouth  |                                                    |

|           |           |           |                         |        |           |
|-----------|-----------|-----------|-------------------------|--------|-----------|
|           |           |           | plaque                  |        |           |
| 338793263 | SRS054061 | SRR061306 | Anterior nares          | Skin   | HPV42 (8) |
| 338793263 | SRS054061 | SRR061301 | Anterior nares          | Skin   | HPV42 (8) |
| 338793263 | SRS054590 | SRR061219 | Gut                     | Gut    |           |
| 338793263 | SRS054590 | SRR061187 | Gut                     | Gut    | HPV42 (1) |
| 370425937 | SRS022713 | SRR060035 | Gut                     | Gut    |           |
| 370425937 | SRS022719 | SRR060036 | Tongue dorsum           | Mouth  |           |
| 370425937 | SRS022721 | SRR063709 | Buccal mucosa           | Mouth  |           |
| 370425937 | SRS022725 | SRR063790 | Supragingival plaque    | Mouth  |           |
| 370425937 | SRS022725 | SRR063746 | Supragingival plaque    | Mouth  |           |
| 370425937 | SRS022734 | SRR063749 | Posterior fornix        | Vagina |           |
| 370425937 | SRS044662 | SRR064436 | Tongue dorsum           | Mouth  |           |
| 370425937 | SRS044662 | SRR060040 | Tongue dorsum           | Mouth  |           |
| 370425937 | SRS052620 | SRR060043 | Posterior fornix        | Vagina |           |
| 370425937 | SRS052668 | SRR060041 | Buccal mucosa           | Mouth  |           |
| 370425937 | SRS053917 | SRR060042 | Supragingival plaque    | Mouth  |           |
| 370425937 | SRS057478 | SRR060039 | Gut                     | Gut    |           |
| 404239096 | SRS042643 | SRR061292 | Tongue dorsum           | Mouth  |           |
| 404239096 | SRS042643 | SRR061279 | Tongue dorsum           | Mouth  |           |
| 404239096 | SRS043755 | SRR061577 | Supragingival plaque    | Mouth  |           |
| 404239096 | SRS043755 | SRR061576 | Supragingival plaque    | Mouth  |           |
| 404239096 | SRS045049 | SRR062327 | Buccal mucosa           | Mouth  |           |
| 404239096 | SRS045049 | SRR062326 | Buccal mucosa           | Mouth  |           |
| 404239096 | SRS045713 | SRR061583 | Gut                     | Gut    |           |
| 404239096 | SRS045713 | SRR061572 | Gut                     | Gut    |           |
| 404239096 | SRS050025 | SRR061348 | Anterior nares          | Skin   |           |
| 404239096 | SRS050025 | SRR061347 | Anterior nares          | Skin   |           |
| 404239096 | SRS058221 | SRR061288 | R_Retroauricular crease | Skin   |           |
| 404239096 | SRS058221 | SRR061277 | R_Retroauricular crease | Skin   |           |
| 508703490 | SRS047708 | SRR061321 | Anterior nares          | Skin   |           |
| 508703490 | SRS047708 | SRR061278 | Anterior nares          | Skin   |           |
| 508703490 | SRS050184 | SRR061491 | Posterior fornix        | Vagina | HPV62 (1) |
| 508703490 | SRS050184 | SRR061489 | Posterior fornix        | Vagina | HPV62 (6) |
| 508703490 | SRS053335 | SRR061158 | Gut                     | Gut    |           |
| 508703490 | SRS053335 | SRR061151 | Gut                     | Gut    |           |
| 508703490 | SRS053630 | SRR061355 | Supragingival plaque    | Mouth  |           |
| 508703490 | SRS053630 | SRR061346 | Supragingival plaque    | Mouth  |           |
| 508703490 | SRS053854 | SRR061493 | Tongue dorsum           | Mouth  |           |
| 508703490 | SRS053854 | SRR061487 | Tongue dorsum           | Mouth  |           |
| 508703490 | SRS058186 | SRR063525 | Buccal mucosa           | Mouth  |           |

|           |           |           |                      |        |                                                                                                                                 |
|-----------|-----------|-----------|----------------------|--------|---------------------------------------------------------------------------------------------------------------------------------|
| 508703490 | SRS058186 | SRR063514 | Buccal mucosa        | Mouth  |                                                                                                                                 |
| 550534656 | SRS043001 | SRR061556 | Gut                  | Gut    |                                                                                                                                 |
| 550534656 | SRS043001 | SRR061555 | Gut                  | Gut    |                                                                                                                                 |
| 550534656 | SRS044366 | SRR063528 | Supragingival plaque | Mouth  |                                                                                                                                 |
| 550534656 | SRS044366 | SRR063527 | Supragingival plaque | Mouth  | HPV1 (1)                                                                                                                        |
| 550534656 | SRS044373 | SRR061554 | Tongue dorsum        | Mouth  |                                                                                                                                 |
| 550534656 | SRS044373 | SRR061553 | Tongue dorsum        | Mouth  |                                                                                                                                 |
| 550534656 | SRS050007 | SRR063477 | Buccal mucosa        | Mouth  |                                                                                                                                 |
| 550534656 | SRS050007 | SRR063475 | Buccal mucosa        | Mouth  |                                                                                                                                 |
| 550534656 | SRS056906 | SRR062486 | Anterior nares       | Skin   | HPV96 (5)                                                                                                                       |
| 550534656 | SRS056906 | SRR062439 | Anterior nares       | Skin   | HPV96 (4)                                                                                                                       |
| 550534656 | SRS057807 | SRR061561 | Posterior fornix     | Vagina |                                                                                                                                 |
| 550534656 | SRS057807 | SRR061559 | Posterior fornix     | Vagina |                                                                                                                                 |
| 604812005 | SRS043646 | SRR063710 | Buccal mucosa        | Mouth  | HPV32 (244)                                                                                                                     |
| 604812005 | SRS045004 | SRR060152 | Gut                  | Gut    |                                                                                                                                 |
| 604812005 | SRS045127 | SRR060154 | Tongue dorsum        | Mouth  | HPV32 (30)                                                                                                                      |
| 604812005 | SRS045645 | SRR063906 | Gut                  | Gut    |                                                                                                                                 |
| 604812005 | SRS045645 | SRR060044 | Gut                  | Gut    |                                                                                                                                 |
| 604812005 | SRS045645 | SRR063905 | Gut                  | Gut    |                                                                                                                                 |
| 604812005 | SRS046623 | SRR060155 | Buccal mucosa        | Mouth  | HPV107 (1),HPV32 (15)                                                                                                           |
| 604812005 | SRS049268 | SRR060156 | Supragingival plaque | Mouth  |                                                                                                                                 |
| 604812005 | SRS055426 | SRR063692 | Tongue dorsum        | Mouth  | HPV32 (44)                                                                                                                      |
| 604812005 | SRS055426 | SRR063675 | Tongue dorsum        | Mouth  | HPV32 (49),HPV5 (1)                                                                                                             |
| 604812005 | SRS058053 | SRR063708 | Supragingival plaque | Mouth  | HPV32 (1)                                                                                                                       |
| 638754422 | SRS022137 | SRR059953 | Gut                  | Gut    |                                                                                                                                 |
| 638754422 | SRS022137 | SRR059952 | Gut                  | Gut    |                                                                                                                                 |
| 638754422 | SRS022143 | SRR059955 | Tongue dorsum        | Mouth  |                                                                                                                                 |
| 638754422 | SRS022143 | SRR059954 | Tongue dorsum        | Mouth  |                                                                                                                                 |
| 638754422 | SRS022145 | SRR060031 | Buccal mucosa        | Mouth  |                                                                                                                                 |
| 638754422 | SRS022145 | SRR060030 | Buccal mucosa        | Mouth  |                                                                                                                                 |
| 638754422 | SRS022149 | SRR059957 | Supragingival plaque | Mouth  |                                                                                                                                 |
| 638754422 | SRS022149 | SRR059956 | Supragingival plaque | Mouth  |                                                                                                                                 |
| 638754422 | SRS022158 | SRR059963 | Posterior fornix     | Vagina | HPV18 (15),HPV34 (21),HPV39 (5),HPV56 (11),N (2)                                                                                |
| 638754422 | SRS022158 | SRR059962 | Posterior fornix     | Vagina | HPV18 (23),HPV34 (31),HPV39 (7),HPV56 (7),HPV90 (1),N (1)                                                                       |
| 638754422 | SRS042984 | SRR059995 | Supragingival plaque | Mouth  |                                                                                                                                 |
| 638754422 | SRS042984 | SRR059994 | Supragingival plaque | Mouth  |                                                                                                                                 |
| 638754422 | SRS048536 | SRR064532 | Posterior fornix     | Vagina | HPV103 (29),HPV106 (1),HPV18 (833),HPV34 (2396),HPV39 (39),HPV51 (12),HPV56 (78),HPV6 (6),HPV73 (6),HPV74 (1),HPV90 (10),N (20) |

|           |           |           |                      |        |                      |
|-----------|-----------|-----------|----------------------|--------|----------------------|
| 638754422 | SRS048536 | SRR061732 | Posterior fornix     | Vagina | HPV18 (2),HPV34 (10) |
| 638754422 | SRS048536 | SRR061733 | Posterior fornix     | Vagina | HPV18 (4),HPV34 (13) |
| 638754422 | SRS048791 | SRR060082 | Tongue dorsum        | Mouth  |                      |
| 638754422 | SRS048791 | SRR060081 | Tongue dorsum        | Mouth  |                      |
| 638754422 | SRS051116 | SRR060084 | Buccal mucosa        | Mouth  |                      |
| 638754422 | SRS051116 | SRR060083 | Buccal mucosa        | Mouth  |                      |
| 638754422 | SRS055982 | SRR061731 | Gut                  | Gut    |                      |
| 638754422 | SRS055982 | SRR059992 | Gut                  | Gut    | HPV47 (2)            |
| 638754422 | SRS055982 | SRR059993 | Gut                  | Gut    | HPV47 (1)            |
| 638754422 | SRS055982 | SRR061730 | Gut                  | Gut    |                      |
| 675950834 | SRS043239 | SRR061414 | Buccal mucosa        | Mouth  |                      |
| 675950834 | SRS043239 | SRR061412 | Buccal mucosa        | Mouth  |                      |
| 675950834 | SRS050244 | SRR061584 | Tongue dorsum        | Mouth  |                      |
| 675950834 | SRS050244 | SRR061575 | Tongue dorsum        | Mouth  |                      |
| 675950834 | SRS053398 | SRR061586 | Gut                  | Gut    | HPV18 (1)            |
| 675950834 | SRS053398 | SRR061581 | Gut                  | Gut    | HPV18 (1)            |
| 675950834 | SRS055401 | SRR061597 | Supragingival plaque | Mouth  |                      |
| 675950834 | SRS055401 | SRR061579 | Supragingival plaque | Mouth  |                      |
| 675950834 | SRS056796 | SRR062521 | Posterior fornix     | Vagina |                      |
| 675950834 | SRS056796 | SRR061186 | Posterior fornix     | Vagina |                      |
| 686765762 | SRS042457 | SRR066381 | Buccal mucosa        | Mouth  |                      |
| 686765762 | SRS042457 | SRR066380 | Buccal mucosa        | Mouth  |                      |
| 686765762 | SRS043663 | SRR066419 | Tongue dorsum        | Mouth  |                      |
| 686765762 | SRS045313 | SRR063789 | Supragingival plaque | Mouth  |                      |
| 686765762 | SRS045313 | SRR063747 | Supragingival plaque | Mouth  |                      |
| 686765762 | SRS049900 | SRR066421 | Gut                  | Gut    |                      |
| 686765762 | SRS062761 | SRR066417 | Tongue dorsum        | Mouth  |                      |
| 686765762 | SRS064219 | SRR063788 | Supragingival plaque | Mouth  |                      |
| 686765762 | SRS064219 | SRR063748 | Supragingival plaque | Mouth  |                      |
| 686765762 | SRS064645 | SRR066418 | Gut                  | Gut    |                      |
| 686765762 | SRS064645 | SRR063897 | Gut                  | Gut    |                      |
| 686765762 | SRS064645 | SRR063898 | Gut                  | Gut    |                      |
| 686765762 | SRS065133 | SRR066420 | Buccal mucosa        | Mouth  |                      |
| 706846339 | SRS042428 | SRR061591 | Posterior fornix     | Vagina |                      |
| 706846339 | SRS042428 | SRR061578 | Posterior fornix     | Vagina |                      |
| 706846339 | SRS045262 | SRR061400 | Buccal mucosa        | Mouth  |                      |
| 706846339 | SRS045262 | SRR061396 | Buccal mucosa        | Mouth  |                      |
| 706846339 | SRS051941 | SRR061582 | Supragingival plaque | Mouth  |                      |
| 706846339 | SRS051941 | SRR061571 | Supragingival plaque | Mouth  |                      |
| 706846339 | SRS052697 | SRR061284 | Gut                  | Gut    |                      |

|           |           |           |                      |        |                       |
|-----------|-----------|-----------|----------------------|--------|-----------------------|
| 706846339 | SRS052697 | SRR061280 | Gut                  | Gut    |                       |
| 706846339 | SRS054687 | SRR061588 | Tongue dorsum        | Mouth  |                       |
| 706846339 | SRS054687 | SRR061587 | Tongue dorsum        | Mouth  |                       |
| 706846339 | SRS058213 | SRR061418 | Anterior nares       | Skin   | HPV124 (1),HPV146 (2) |
| 706846339 | SRS058213 | SRR061409 | Anterior nares       | Skin   | HPV124 (1),HPV146 (2) |
| 737052003 | SRS047824 | SRR061492 | Tongue dorsum        | Mouth  |                       |
| 737052003 | SRS047824 | SRR061490 | Tongue dorsum        | Mouth  |                       |
| 737052003 | SRS052590 | SRR061506 | Anterior nares       | Skin   |                       |
| 737052003 | SRS052876 | SRR062496 | Supragingival plaque | Mouth  |                       |
| 737052003 | SRS052876 | SRR062295 | Supragingival plaque | Mouth  |                       |
| 737052003 | SRS054956 | SRR061574 | Gut                  | Gut    |                       |
| 737052003 | SRS054956 | SRR061570 | Gut                  | Gut    |                       |
| 737052003 | SRS055118 | SRR061429 | Buccal mucosa        | Mouth  |                       |
| 737052003 | SRS055118 | SRR061425 | Buccal mucosa        | Mouth  |                       |
| 737052003 | SRS056695 | SRR063493 | Posterior fornix     | Vagina |                       |
| 737052003 | SRS056695 | SRR063489 | Posterior fornix     | Vagina |                       |
| 763435843 | SRS013876 | SRR063526 | Anterior nares       | Skin   |                       |
| 763435843 | SRS013876 | SRR063524 | Anterior nares       | Skin   |                       |
| 763435843 | SRS013879 | SRR062507 | Tongue dorsum        | Mouth  |                       |
| 763435843 | SRS013879 | SRR062502 | Tongue dorsum        | Mouth  |                       |
| 763435843 | SRS013881 | SRR061298 | Buccal mucosa        | Mouth  |                       |
| 763435843 | SRS013881 | SRR061287 | Buccal mucosa        | Mouth  |                       |
| 763435843 | SRS014107 | SRR062424 | Subgingival plaque   | Mouth  |                       |
| 763435843 | SRS014107 | SRR062421 | Subgingival plaque   | Mouth  |                       |
| 763435843 | SRS015793 | SRR061328 | Anterior nares       | Skin   |                       |
| 763435843 | SRS015793 | SRR061323 | Anterior nares       | Skin   |                       |
| 763435843 | SRS015794 | SRR063555 | Gut                  | Gut    |                       |
| 763435843 | SRS015794 | SRR061185 | Gut                  | Gut    |                       |
| 763435843 | SRS015794 | SRR061195 | Gut                  | Gut    |                       |
| 763435843 | SRS015794 | SRR063540 | Gut                  | Gut    |                       |
| 763435843 | SRS015794 | SRR063542 | Gut                  | Gut    |                       |
| 763435843 | SRS015794 | SRR063551 | Gut                  | Gut    |                       |
| 763435843 | SRS015794 | SRR063553 | Gut                  | Gut    |                       |
| 763435843 | SRS015794 | SRR063554 | Gut                  | Gut    |                       |
| 763435843 | SRS015797 | SRR062520 | Tongue dorsum        | Mouth  |                       |
| 763435843 | SRS015797 | SRR061276 | Tongue dorsum        | Mouth  |                       |
| 763435843 | SRS015799 | SRR061538 | Buccal mucosa        | Mouth  |                       |
| 763435843 | SRS015799 | SRR061537 | Buccal mucosa        | Mouth  |                       |
| 763435843 | SRS015803 | SRR061389 | Supragingival plaque | Mouth  |                       |
| 763435843 | SRS015803 | SRR061312 | Supragingival plaque | Mouth  |                       |
| 763496533 | SRS013942 | SRR062441 | Saliva               | Mouth  |                       |

|           |           |           |                                  |       |          |
|-----------|-----------|-----------|----------------------------------|-------|----------|
| 763496533 | SRS013942 | SRR062435 | Saliva                           | Mouth |          |
| 763496533 | SRS013945 | SRR062342 | Buccal mucosa                    | Mouth |          |
| 763496533 | SRS013945 | SRR061338 | Buccal mucosa                    | Mouth |          |
| 763496533 | SRS013945 | SRR061357 | Buccal mucosa                    | Mouth |          |
| 763496533 | SRS013946 | SRR062361 | Attached/Keratini<br>zed gingiva | Mouth |          |
| 763496533 | SRS013946 | SRR062352 | Attached/Keratini<br>zed gingiva | Mouth |          |
| 763496533 | SRS013947 | SRR062463 | Palatine Tonsils                 | Mouth |          |
| 763496533 | SRS013947 | SRR062411 | Palatine Tonsils                 | Mouth |          |
| 763496533 | SRS013948 | SRR062416 | Throat                           | Mouth |          |
| 763496533 | SRS013948 | SRR062392 | Throat                           | Mouth |          |
| 763496533 | SRS013949 | SRR061319 | Supragingival<br>plaque          | Mouth |          |
| 763496533 | SRS013949 | SRR061311 | Supragingival<br>plaque          | Mouth |          |
| 763496533 | SRS013950 | SRR062343 | Subgingival<br>plaque            | Mouth |          |
| 763496533 | SRS013950 | SRR062299 | Subgingival<br>plaque            | Mouth |          |
| 763496533 | SRS013950 | SRR062303 | Subgingival<br>plaque            | Mouth |          |
| 763496533 | SRS013950 | SRR062339 | Subgingival<br>plaque            | Mouth |          |
| 763496533 | SRS013951 | SRR062323 | Gut                              | Gut   |          |
| 763496533 | SRS013951 | SRR061137 | Gut                              | Gut   |          |
| 763496533 | SRS013956 | SRR061310 | Anterior nares                   | Skin  | HPV4 (1) |
| 763496533 | SRS013956 | SRR061303 | Anterior nares                   | Skin  | HPV4 (1) |
| 763496533 | SRS019116 | SRR061423 | R_Retroauricular<br>crease       | Skin  | HPV4 (2) |
| 763496533 | SRS019116 | SRR061401 | R_Retroauricular<br>crease       | Skin  |          |
| 763496533 | SRS019119 | SRR062449 | Anterior nares                   | Skin  |          |
| 763496533 | SRS019119 | SRR062358 | Anterior nares                   | Skin  |          |
| 763496533 | SRS019120 | SRR062462 | Saliva                           | Mouth |          |
| 763496533 | SRS019120 | SRR062415 | Saliva                           | Mouth |          |
| 763496533 | SRS019122 | SRR061300 | Tongue dorsum                    | Mouth |          |
| 763496533 | SRS019122 | SRR061295 | Tongue dorsum                    | Mouth |          |
| 763496533 | SRS019124 | SRR061148 | Buccal mucosa                    | Mouth |          |
| 763496533 | SRS019124 | SRR061142 | Buccal mucosa                    | Mouth |          |
| 763496533 | SRS019125 | SRR062294 | Attached/Keratini<br>zed gingiva | Mouth |          |
| 763496533 | SRS019125 | SRR062277 | Attached/Keratini<br>zed gingiva | Mouth |          |
| 763496533 | SRS019126 | SRR062469 | Palatine Tonsils                 | Mouth |          |
| 763496533 | SRS019126 | SRR062468 | Palatine Tonsils                 | Mouth |          |
| 763496533 | SRS019127 | SRR062420 | Throat                           | Mouth |          |
| 763496533 | SRS019127 | SRR062391 | Throat                           | Mouth |          |
| 763496533 | SRS019128 | SRR061314 | Supragingival<br>plaque          | Mouth |          |
| 763496533 | SRS019128 | SRR061313 | Supragingival<br>plaque          | Mouth |          |

|           |           |           |                               |        |                     |
|-----------|-----------|-----------|-------------------------------|--------|---------------------|
| 763496533 | SRS019129 | SRR062478 | Subgingival plaque            | Mouth  | HPV24 (1)           |
| 763496533 | SRS019129 | SRR062477 | Subgingival plaque            | Mouth  |                     |
| 763496533 | SRS019161 | SRR062324 | Gut                           | Gut    |                     |
| 763496533 | SRS019161 | SRR061139 | Gut                           | Gut    |                     |
| 763536994 | SRS014271 | SRR062433 | Tongue dorsum                 | Mouth  |                     |
| 763536994 | SRS014271 | SRR062419 | Tongue dorsum                 | Mouth  |                     |
| 763536994 | SRS014287 | SRR062388 | Gut                           | Gut    |                     |
| 763536994 | SRS014287 | SRR062386 | Gut                           | Gut    |                     |
| 763536994 | SRS047219 | SRR062456 | Tongue dorsum                 | Mouth  |                     |
| 763536994 | SRS047219 | SRR062380 | Tongue dorsum                 | Mouth  |                     |
| 763536994 | SRS050422 | SRR061486 | Gut                           | Gut    |                     |
| 763536994 | SRS050422 | SRR061484 | Gut                           | Gut    | HPV47 (3)           |
| 763536994 | SRS062427 | SRR062423 | Gut                           | Gut    |                     |
| 763536994 | SRS062427 | SRR062395 | Gut                           | Gut    |                     |
| 763536994 | SRS062544 | SRR062398 | Tongue dorsum                 | Mouth  |                     |
| 763536994 | SRS062544 | SRR062347 | Tongue dorsum                 | Mouth  |                     |
| 763536994 | SRS063287 | SRR062431 | Buccal mucosa                 | Mouth  |                     |
| 763536994 | SRS063287 | SRR062429 | Buccal mucosa                 | Mouth  |                     |
| 763536994 | SRS064493 | SRR062410 | Supragingival plaque          | Mouth  |                     |
| 763536994 | SRS064493 | SRR062400 | Supragingival plaque          | Mouth  |                     |
| 763577454 | SRS014459 | SRR062321 | Gut                           | Gut    |                     |
| 763577454 | SRS014459 | SRR061138 | Gut                           | Gut    |                     |
| 763577454 | SRS014464 | SRR061407 | Anterior nares                | Skin   |                     |
| 763577454 | SRS014464 | SRR061386 | Anterior nares                | Skin   |                     |
| 763577454 | SRS014465 | SRR062473 | Vagina introitus              | Vagina | HPV90 (3)           |
| 763577454 | SRS014465 | SRR062470 | Vagina introitus              | Vagina | HPV90 (2)           |
| 763577454 | SRS014466 | SRR062357 | Mid Vagina                    | Vagina | HPV90 (1)           |
| 763577454 | SRS014466 | SRR062353 | Mid Vagina                    | Vagina | HPV45 (2),HPV90 (5) |
| 763577454 | SRS014468 | SRR062413 | Saliva                        | Mouth  |                     |
| 763577454 | SRS014468 | SRR062389 | Saliva                        | Mouth  |                     |
| 763577454 | SRS014470 | SRR062308 | Tongue dorsum                 | Mouth  |                     |
| 763577454 | SRS014470 | SRR062306 | Tongue dorsum                 | Mouth  |                     |
| 763577454 | SRS014472 | SRR061411 | Buccal mucosa                 | Mouth  |                     |
| 763577454 | SRS014472 | SRR061388 | Buccal mucosa                 | Mouth  |                     |
| 763577454 | SRS014473 | SRR062432 | Attached/Keratini zed gingiva | Mouth  |                     |
| 763577454 | SRS014473 | SRR062379 | Attached/Keratini zed gingiva | Mouth  |                     |
| 763577454 | SRS014474 | SRR062472 | Palatine Tonsils              | Mouth  |                     |
| 763577454 | SRS014474 | SRR062471 | Palatine Tonsils              | Mouth  |                     |
| 763577454 | SRS014475 | SRR062367 | Throat                        | Mouth  |                     |
| 763577454 | SRS014475 | SRR062366 | Throat                        | Mouth  |                     |
| 763577454 | SRS014476 | SRR061452 | Supragingival plaque          | Mouth  |                     |



|           |           |           |                               |        |                     |
|-----------|-----------|-----------|-------------------------------|--------|---------------------|
| 763577454 | SRS014476 | SRR061436 | Supragingival plaque          | Mouth  |                     |
| 763577454 | SRS014477 | SRR062403 | Subgingival plaque            | Mouth  |                     |
| 763577454 | SRS014477 | SRR062351 | Subgingival plaque            | Mouth  |                     |
| 763577454 | SRS014494 | SRR061180 | Posterior fornix              | Vagina | HPV45 (1),HPV90 (5) |
| 763577454 | SRS014494 | SRR061179 | Posterior fornix              | Vagina | HPV90 (11)          |
| 763577454 | SRS015055 | SRR062372 | Saliva                        | Mouth  |                     |
| 763577454 | SRS015055 | SRR062371 | Saliva                        | Mouth  |                     |
| 763577454 | SRS015057 | SRR062283 | Tongue dorsum                 | Mouth  |                     |
| 763577454 | SRS015057 | SRR062282 | Tongue dorsum                 | Mouth  |                     |
| 763577454 | SRS015059 | SRR061467 | Buccal mucosa                 | Mouth  |                     |
| 763577454 | SRS015059 | SRR061464 | Buccal mucosa                 | Mouth  |                     |
| 763577454 | SRS015060 | SRR062334 | Attached/Keratini zed gingiva | Mouth  |                     |
| 763577454 | SRS015060 | SRR062331 | Attached/Keratini zed gingiva | Mouth  |                     |
| 763577454 | SRS015061 | SRR062414 | Palatine Tonsils              | Mouth  |                     |
| 763577454 | SRS015061 | SRR062387 | Palatine Tonsils              | Mouth  |                     |
| 763577454 | SRS015062 | SRR062393 | Throat                        | Mouth  |                     |
| 763577454 | SRS015062 | SRR062368 | Throat                        | Mouth  |                     |
| 763577454 | SRS015063 | SRR061367 | Supragingival plaque          | Mouth  |                     |
| 763577454 | SRS015063 | SRR061365 | Supragingival plaque          | Mouth  |                     |
| 763577454 | SRS015064 | SRR062333 | Subgingival plaque            | Mouth  |                     |
| 763577454 | SRS015064 | SRR062332 | Subgingival plaque            | Mouth  |                     |
| 763577454 | SRS015065 | SRR062320 | Gut                           | Gut    |                     |
| 763577454 | SRS015065 | SRR061136 | Gut                           | Gut    |                     |
| 763577454 | SRS015071 | SRR062370 | Vagina introitus              | Vagina | HPV90 (6)           |
| 763577454 | SRS015071 | SRR062369 | Vagina introitus              | Vagina | HPV90 (13)          |
| 763577454 | SRS015072 | SRR062301 | Mid Vagina                    | Vagina |                     |
| 763577454 | SRS015072 | SRR062276 | Mid Vagina                    | Vagina |                     |
| 763577454 | SRS015073 | SRR061272 | Posterior fornix              | Vagina | HPV90 (7)           |
| 763577454 | SRS015073 | SRR061201 | Posterior fornix              | Vagina | HPV90 (9)           |
| 763597684 | SRS019582 | SRR062457 | Gut                           | Gut    |                     |
| 763597684 | SRS019582 | SRR062375 | Gut                           | Gut    |                     |
| 763678604 | SRS014235 | SRR061558 | Gut                           | Gut    | HPV47 (2)           |
| 763678604 | SRS014235 | SRR061557 | Gut                           | Gut    |                     |
| 763678604 | SRS019685 | SRR061507 | Gut                           | Gut    | HPV47 (2)           |
| 763678604 | SRS019685 | SRR061499 | Gut                           | Gut    |                     |
| 763759525 | SRS015154 | SRR061227 | Buccal mucosa                 | Mouth  |                     |
| 763759525 | SRS015154 | SRR061223 | Buccal mucosa                 | Mouth  |                     |
| 763759525 | SRS015158 | SRR062529 | Supragingival plaque          | Mouth  |                     |
| 763759525 | SRS015158 | SRR061232 | Supragingival plaque          | Mouth  |                     |

|           |           |           |                      |        |                                                     |
|-----------|-----------|-----------|----------------------|--------|-----------------------------------------------------|
| 763759525 | SRS015168 | SRR062534 | Posterior fornix     | Vagina |                                                     |
| 763759525 | SRS015168 | SRR062532 | Posterior fornix     | Vagina |                                                     |
| 763759525 | SRS015174 | SRR061473 | Tongue dorsum        | Mouth  |                                                     |
| 763759525 | SRS015174 | SRR061245 | Tongue dorsum        | Mouth  |                                                     |
| 763759525 | SRS015174 | SRR061259 | Tongue dorsum        | Mouth  |                                                     |
| 763759525 | SRS015190 | SRR061147 | Gut                  | Gut    |                                                     |
| 763759525 | SRS015190 | SRR061143 | Gut                  | Gut    |                                                     |
| 763759525 | SRS043018 | SRR061253 | Supragingival plaque | Mouth  | HPV19 (1)                                           |
| 763759525 | SRS043018 | SRR061251 | Supragingival plaque | Mouth  |                                                     |
| 763759525 | SRS043411 | SRR061190 | Gut                  | Gut    |                                                     |
| 763759525 | SRS043411 | SRR061188 | Gut                  | Gut    |                                                     |
| 763759525 | SRS044742 | SRR061207 | Posterior fornix     | Vagina | HPV101 (2)                                          |
| 763759525 | SRS044742 | SRR061206 | Posterior fornix     | Vagina | HPV101 (1)                                          |
| 763759525 | SRS045978 | SRR063463 | Buccal mucosa        | Mouth  |                                                     |
| 763759525 | SRS045978 | SRR063462 | Buccal mucosa        | Mouth  |                                                     |
| 763759525 | SRS047210 | SRR061359 | Tongue dorsum        | Mouth  |                                                     |
| 763759525 | SRS047210 | SRR061324 | Tongue dorsum        | Mouth  |                                                     |
| 763759525 | SRS056210 | SRR061271 | Anterior nares       | Skin   |                                                     |
| 763759525 | SRS056210 | SRR061203 | Anterior nares       | Skin   | HPV19 (2)                                           |
| 763820215 | SRS014124 | SRR061449 | Tongue dorsum        | Mouth  |                                                     |
| 763820215 | SRS014124 | SRR061448 | Tongue dorsum        | Mouth  |                                                     |
| 763820215 | SRS014126 | SRR061390 | Buccal mucosa        | Mouth  |                                                     |
| 763820215 | SRS014126 | SRR061349 | Buccal mucosa        | Mouth  |                                                     |
| 763820215 | SRS014313 | SRR063469 | Gut                  | Gut    | HPV28 (1)                                           |
| 763820215 | SRS014313 | SRR063468 | Gut                  | Gut    |                                                     |
| 763820215 | SRS014343 | SRR062365 | Posterior fornix     | Vagina | HPV131 (2),HPV134 (2),HPV52 (577),HPV89 (10),N (14) |
| 763820215 | SRS014343 | SRR062364 | Posterior fornix     | Vagina | HPV52 (552),HPV89 (20),N (15)                       |
| 763820215 | SRS042910 | SRR061447 | Tongue dorsum        | Mouth  |                                                     |
| 763820215 | SRS042910 | SRR061445 | Tongue dorsum        | Mouth  |                                                     |
| 763820215 | SRS043676 | SRR061385 | Buccal mucosa        | Mouth  |                                                     |
| 763820215 | SRS043676 | SRR061374 | Buccal mucosa        | Mouth  |                                                     |
| 763820215 | SRS051378 | SRR062491 | Supragingival plaque | Mouth  |                                                     |
| 763820215 | SRS051378 | SRR062490 | Supragingival plaque | Mouth  |                                                     |
| 763820215 | SRS054962 | SRR061356 | Posterior fornix     | Vagina | HPV118 (2),HPV89 (2),N (1)                          |
| 763820215 | SRS054962 | SRR061345 | Posterior fornix     | Vagina | HPV118 (3),HPV89 (3)                                |
| 763820215 | SRS058723 | SRR063547 | Gut                  | Gut    |                                                     |
| 763820215 | SRS058723 | SRR063470 | Gut                  | Gut    |                                                     |
| 763820215 | SRS058723 | SRR063471 | Gut                  | Gut    |                                                     |
| 763820215 | SRS058723 | SRR063543 | Gut                  | Gut    |                                                     |
| 763820215 | SRS058723 | SRR063544 | Gut                  | Gut    |                                                     |
| 763820215 | SRS058723 | SRR063545 | Gut                  | Gut    |                                                     |
| 763840445 | SRS014573 | SRR062360 | Tongue dorsum        | Mouth  |                                                     |

|           |           |           |                      |        |                                |
|-----------|-----------|-----------|----------------------|--------|--------------------------------|
| 763840445 | SRS014573 | SRR062349 | Tongue dorsum        | Mouth  |                                |
| 763840445 | SRS014575 | SRR061408 | Buccal mucosa        | Mouth  |                                |
| 763840445 | SRS014575 | SRR061379 | Buccal mucosa        | Mouth  |                                |
| 763840445 | SRS014578 | SRR061320 | Supragingival plaque | Mouth  |                                |
| 763840445 | SRS014578 | SRR061282 | Supragingival plaque | Mouth  |                                |
| 763840445 | SRS014613 | SRR061229 | Gut                  | Gut    |                                |
| 763840445 | SRS014613 | SRR061226 | Gut                  | Gut    |                                |
| 763840445 | SRS014629 | SRR061246 | Posterior fornix     | Vagina |                                |
| 763840445 | SRS014629 | SRR061196 | Posterior fornix     | Vagina |                                |
| 763840445 | SRS062713 | SRR063465 | Anterior nares       | Skin   | HPV109 (1)                     |
| 763840445 | SRS062713 | SRR063464 | Anterior nares       | Skin   | HPV126 (2),HPV19 (1),HPV36 (2) |
| 763840445 | SRS063193 | SRR061318 | Tongue dorsum        | Mouth  | N (1)                          |
| 763840445 | SRS063193 | SRR061315 | Tongue dorsum        | Mouth  |                                |
| 763840445 | SRS063417 | SRR062531 | Posterior fornix     | Vagina |                                |
| 763840445 | SRS063417 | SRR061189 | Posterior fornix     | Vagina |                                |
| 763840445 | SRS063478 | SRR063479 | Buccal mucosa        | Mouth  |                                |
| 763840445 | SRS063478 | SRR063478 | Buccal mucosa        | Mouth  | HPV36 (1),HPV80 (1)            |
| 763840445 | SRS063999 | SRR061316 | Supragingival plaque | Mouth  |                                |
| 763840445 | SRS063999 | SRR061286 | Supragingival plaque | Mouth  |                                |
| 763840445 | SRS064276 | SRR061199 | Gut                  | Gut    |                                |
| 763840445 | SRS064276 | SRR061181 | Gut                  | Gut    |                                |
| 763860675 | SRS014888 | SRR063497 | Tongue dorsum        | Mouth  |                                |
| 763860675 | SRS014888 | SRR063496 | Tongue dorsum        | Mouth  |                                |
| 763860675 | SRS014890 | SRR061479 | Buccal mucosa        | Mouth  |                                |
| 763860675 | SRS014890 | SRR061468 | Buccal mucosa        | Mouth  |                                |
| 763860675 | SRS014894 | SRR061335 | Supragingival plaque | Mouth  |                                |
| 763860675 | SRS014894 | SRR061333 | Supragingival plaque | Mouth  |                                |
| 763860675 | SRS014901 | SRR061391 | Anterior nares       | Skin   | HPV146 (1)                     |
| 763860675 | SRS014901 | SRR061370 | Anterior nares       | Skin   | HPV146 (1),HPV50 (1),N (1)     |
| 763860675 | SRS014923 | SRR061368 | Gut                  | Gut    |                                |
| 763860675 | SRS014923 | SRR061326 | Gut                  | Gut    |                                |
| 763860675 | SRS050925 | SRR061443 | Gut                  | Gut    |                                |
| 763860675 | SRS050925 | SRR061442 | Gut                  | Gut    |                                |
| 763860675 | SRS055378 | SRR061455 | Supragingival plaque | Mouth  |                                |
| 763860675 | SRS055378 | SRR061453 | Supragingival plaque | Mouth  |                                |
| 763860675 | SRS057355 | SRR062329 | Tongue dorsum        | Mouth  |                                |
| 763860675 | SRS057355 | SRR062328 | Tongue dorsum        | Mouth  |                                |
| 763901136 | SRS015038 | SRR063461 | Tongue dorsum        | Mouth  |                                |
| 763901136 | SRS015038 | SRR063460 | Tongue dorsum        | Mouth  |                                |
| 763901136 | SRS015040 | SRR062525 | Buccal mucosa        | Mouth  |                                |

|           |           |           |                               |        |                                                                                                           |
|-----------|-----------|-----------|-------------------------------|--------|-----------------------------------------------------------------------------------------------------------|
| 763901136 | SRS015040 | SRR061194 | Buccal mucosa                 | Mouth  |                                                                                                           |
| 763901136 | SRS015044 | SRR063532 | Supragingival plaque          | Mouth  |                                                                                                           |
| 763901136 | SRS015044 | SRR063520 | Supragingival plaque          | Mouth  |                                                                                                           |
| 763901136 | SRS015051 | SRR062516 | Anterior nares                | Skin   | HPV101 (1),HPV112 (3),HPV119 (1),HPV144 (3),HPV149 (7),HPV155 (1),HPV156 (5),HPV17 (9),HPV50 (127),N (10) |
| 763901136 | SRS015051 | SRR061329 | Anterior nares                | Skin   | HPV112 (3),HPV119 (1),HPV144 (6),HPV149 (7),HPV155 (2),HPV156 (4),HPV17 (5),HPV50 (119),N (14)            |
| 763901136 | SRS015051 | SRR061360 | Anterior nares                | Skin   | HPV112 (2),HPV119 (2),HPV144 (1),HPV149 (3),HPV155 (1),HPV156 (2),HPV17 (7),HPV50 (113),N (8)             |
| 763901136 | SRS015054 | SRR063487 | Posterior fornix              | Vagina |                                                                                                           |
| 763901136 | SRS015054 | SRR063486 | Posterior fornix              | Vagina |                                                                                                           |
| 763901136 | SRS015133 | SRR061204 | Gut                           | Gut    |                                                                                                           |
| 763901136 | SRS015133 | SRR061182 | Gut                           | Gut    |                                                                                                           |
| 763901136 | SRS063603 | SRR062512 | Supragingival plaque          | Mouth  |                                                                                                           |
| 763901136 | SRS063603 | SRR062508 | Supragingival plaque          | Mouth  |                                                                                                           |
| 763901136 | SRS063985 | SRR062467 | Gut                           | Gut    | HPV47 (4)                                                                                                 |
| 763901136 | SRS063985 | SRR062466 | Gut                           | Gut    | HPV47 (2)                                                                                                 |
| 763901136 | SRS064423 | SRR061457 | Tongue dorsum                 | Mouth  |                                                                                                           |
| 763901136 | SRS064423 | SRR061440 | Tongue dorsum                 | Mouth  |                                                                                                           |
| 763901136 | SRS064809 | SRR062399 | Buccal mucosa                 | Mouth  |                                                                                                           |
| 763901136 | SRS064809 | SRR062344 | Buccal mucosa                 | Mouth  |                                                                                                           |
| 763901136 | SRS065278 | SRR062475 | Tongue dorsum                 | Mouth  |                                                                                                           |
| 763901136 | SRS065278 | SRR062474 | Tongue dorsum                 | Mouth  |                                                                                                           |
| 763901136 | SRS065347 | SRR062340 | Posterior fornix              | Vagina |                                                                                                           |
| 763901136 | SRS065347 | SRR062335 | Posterior fornix              | Vagina |                                                                                                           |
| 763961826 | SRS014682 | SRR061410 | Anterior nares                | Skin   | HPV124 (2)                                                                                                |
| 763961826 | SRS014682 | SRR061375 | Anterior nares                | Skin   | HPV14 (1)                                                                                                 |
| 763961826 | SRS014683 | SRR061135 | Gut                           | Gut    |                                                                                                           |
| 763961826 | SRS014683 | SRR061044 | Gut                           | Gut    |                                                                                                           |
| 763961826 | SRS014684 | SRR061258 | Tongue dorsum                 | Mouth  |                                                                                                           |
| 763961826 | SRS014684 | SRR061244 | Tongue dorsum                 | Mouth  |                                                                                                           |
| 763961826 | SRS014686 | SRR062422 | Buccal mucosa                 | Mouth  |                                                                                                           |
| 763961826 | SRS014686 | SRR062401 | Buccal mucosa                 | Mouth  |                                                                                                           |
| 763961826 | SRS014687 | SRR062509 | Attached/Keratini zed gingiva | Mouth  |                                                                                                           |
| 763961826 | SRS014687 | SRR062500 | Attached/Keratini zed gingiva | Mouth  |                                                                                                           |
| 763961826 | SRS014689 | SRR062405 | Throat                        | Mouth  |                                                                                                           |
| 763961826 | SRS014689 | SRR062394 | Throat                        | Mouth  |                                                                                                           |
| 763961826 | SRS014690 | SRR062409 | Supragingival plaque          | Mouth  |                                                                                                           |

|           |           |           |                               |       |                                                                                                     |
|-----------|-----------|-----------|-------------------------------|-------|-----------------------------------------------------------------------------------------------------|
| 763961826 | SRS014690 | SRR062354 | Supragingival plaque          | Mouth |                                                                                                     |
| 763961826 | SRS014691 | SRR062511 | Subgingival plaque            | Mouth | N (1)                                                                                               |
| 763961826 | SRS014691 | SRR062501 | Subgingival plaque            | Mouth |                                                                                                     |
| 763961826 | SRS014692 | SRR062402 | Saliva                        | Mouth |                                                                                                     |
| 763961826 | SRS014692 | SRR062396 | Saliva                        | Mouth |                                                                                                     |
| 763961826 | SRS019015 | SRR062412 | L_Retroauricular crease       | Skin  | HPV104 (2),HPV111 (1),HPV124 (5),HPV75 (737),HPV76 (31),HPV8 (1),HPV92 (25),HPV9 (1),N (1)          |
| 763961826 | SRS019015 | SRR062408 | L_Retroauricular crease       | Skin  | HPV124 (5),HPV148 (1),HPV24 (1),HPV75 (677),HPV76 (29),HPV80 (2),HPV92 (31),N (1)                   |
| 763961826 | SRS019016 | SRR061430 | R_Retroauricular crease       | Skin  | HPV104 (1),HPV119 (1),HPV147 (1),HPV149 (1),HPV153 (1),HPV24 (1),HPV75 (2),HPV8 (3),HPV92 (1),N (4) |
| 763961826 | SRS019016 | SRR061393 | R_Retroauricular crease       | Skin  | HPV120 (1),HPV144 (1),HPV147 (1),HPV24 (1),HPV75 (3),N (2)                                          |
| 763961826 | SRS019019 | SRR061478 | Anterior nares                | Skin  | HPV107 (1),HPV23 (2)                                                                                |
| 763961826 | SRS019019 | SRR061471 | Anterior nares                | Skin  | HPV107 (1),HPV23 (4)                                                                                |
| 763961826 | SRS019022 | SRR061353 | Tongue dorsum                 | Mouth |                                                                                                     |
| 763961826 | SRS019022 | SRR061341 | Tongue dorsum                 | Mouth |                                                                                                     |
| 763961826 | SRS019024 | SRR061402 | Buccal mucosa                 | Mouth |                                                                                                     |
| 763961826 | SRS019024 | SRR061344 | Buccal mucosa                 | Mouth |                                                                                                     |
| 763961826 | SRS019025 | SRR062489 | Attached/Keratini zed gingiva | Mouth |                                                                                                     |
| 763961826 | SRS019025 | SRR062481 | Attached/Keratini zed gingiva | Mouth |                                                                                                     |
| 763961826 | SRS019026 | SRR062518 | Palatine Tonsils              | Mouth |                                                                                                     |
| 763961826 | SRS019026 | SRR062517 | Palatine Tonsils              | Mouth |                                                                                                     |
| 763961826 | SRS019027 | SRR062363 | Throat                        | Mouth | HPV66 (1)                                                                                           |
| 763961826 | SRS019027 | SRR062362 | Throat                        | Mouth |                                                                                                     |
| 763961826 | SRS019028 | SRR062505 | Supragingival plaque          | Mouth |                                                                                                     |
| 763961826 | SRS019028 | SRR062498 | Supragingival plaque          | Mouth |                                                                                                     |
| 763961826 | SRS019029 | SRR062302 | Subgingival plaque            | Mouth |                                                                                                     |
| 763961826 | SRS019029 | SRR062298 | Subgingival plaque            | Mouth |                                                                                                     |
| 763961826 | SRS019030 | SRR063585 | Gut                           | Gut   |                                                                                                     |
| 763961826 | SRS019030 | SRR061140 | Gut                           | Gut   |                                                                                                     |
| 763961826 | SRS019030 | SRR062322 | Gut                           | Gut   |                                                                                                     |
| 763961826 | SRS019030 | SRR063559 | Gut                           | Gut   |                                                                                                     |
| 763961826 | SRS019030 | SRR063565 | Gut                           | Gut   |                                                                                                     |
| 763961826 | SRS019030 | SRR063566 | Gut                           | Gut   |                                                                                                     |
| 763961826 | SRS019030 | SRR063567 | Gut                           | Gut   |                                                                                                     |
| 763961826 | SRS019030 | SRR063568 | Gut                           | Gut   |                                                                                                     |
| 763961826 | SRS019030 | SRR063569 | Gut                           | Gut   |                                                                                                     |
| 763961826 | SRS019030 | SRR063572 | Gut                           | Gut   |                                                                                                     |

|           |           |           |                         |       |                                                                      |
|-----------|-----------|-----------|-------------------------|-------|----------------------------------------------------------------------|
| 763961826 | SRS019030 | SRR063573 | Gut                     | Gut   |                                                                      |
| 763961826 | SRS019030 | SRR063574 | Gut                     | Gut   |                                                                      |
| 763961826 | SRS019030 | SRR063575 | Gut                     | Gut   |                                                                      |
| 763961826 | SRS019030 | SRR063577 | Gut                     | Gut   |                                                                      |
| 763961826 | SRS019030 | SRR063578 | Gut                     | Gut   |                                                                      |
| 763961826 | SRS019030 | SRR063580 | Gut                     | Gut   |                                                                      |
| 763961826 | SRS019030 | SRR063581 | Gut                     | Gut   |                                                                      |
| 763961826 | SRS019030 | SRR063582 | Gut                     | Gut   |                                                                      |
| 763961826 | SRS019030 | SRR063583 | Gut                     | Gut   |                                                                      |
| 763961826 | SRS019030 | SRR063584 | Gut                     | Gut   |                                                                      |
| 763961826 | SRS019033 | SRR062438 | R_Retroauricular crease | Skin  | HPV121 (1),HPV130 (1),HPV144 (2),HPV24 (2),HPV75 (2),HPV92 (1),N (2) |
| 763961826 | SRS019033 | SRR062437 | R_Retroauricular crease | Skin  | HPV121 (1),HPV130 (1),HPV144 (2),HPV24 (2),HPV75 (1),N (2)           |
| 763961826 | SRS019039 | SRR062444 | Anterior nares          | Skin  |                                                                      |
| 763961826 | SRS019039 | SRR062443 | Anterior nares          | Skin  |                                                                      |
| 763961826 | SRS019045 | SRR062383 | Tongue dorsum           | Mouth |                                                                      |
| 763961826 | SRS019045 | SRR062374 | Tongue dorsum           | Mouth | HPV20 (1)                                                            |
| 763982056 | SRS015264 | SRR063481 | Gut                     | Gut   |                                                                      |
| 763982056 | SRS015264 | SRR063480 | Gut                     | Gut   |                                                                      |
| 763982056 | SRS015269 | SRR061539 | Anterior nares          | Skin  |                                                                      |
| 763982056 | SRS015269 | SRR061533 | Anterior nares          | Skin  |                                                                      |
| 763982056 | SRS015272 | SRR061450 | Tongue dorsum           | Mouth |                                                                      |
| 763982056 | SRS015272 | SRR061435 | Tongue dorsum           | Mouth |                                                                      |
| 763982056 | SRS015274 | SRR063501 | Buccal mucosa           | Mouth |                                                                      |
| 763982056 | SRS015274 | SRR063499 | Buccal mucosa           | Mouth |                                                                      |
| 763982056 | SRS015278 | SRR061529 | Supragingival plaque    | Mouth |                                                                      |
| 763982056 | SRS015278 | SRR061528 | Supragingival plaque    | Mouth |                                                                      |
| 763982056 | SRS043772 | SRR062465 | Supragingival plaque    | Mouth | HPV146 (1),HPV153 (1)                                                |
| 763982056 | SRS043772 | SRR062464 | Supragingival plaque    | Mouth | HPV146 (1),HPV153 (1)                                                |
| 763982056 | SRS044486 | SRR061377 | Tongue dorsum           | Mouth |                                                                      |
| 763982056 | SRS044486 | SRR061327 | Tongue dorsum           | Mouth |                                                                      |
| 763982056 | SRS047844 | SRR061293 | Anterior nares          | Skin  |                                                                      |
| 763982056 | SRS047844 | SRR061291 | Anterior nares          | Skin  |                                                                      |
| 763982056 | SRS050299 | SRR062407 | Gut                     | Gut   |                                                                      |
| 763982056 | SRS050299 | SRR062406 | Gut                     | Gut   |                                                                      |
| 764002286 | SRS015854 | SRR061497 | Gut                     | Gut   |                                                                      |
| 764002286 | SRS015854 | SRR061496 | Gut                     | Gut   |                                                                      |
| 764042746 | SRS015369 | SRR063589 | Gut                     | Gut   |                                                                      |
| 764042746 | SRS015369 | SRR061235 | Gut                     | Gut   |                                                                      |
| 764042746 | SRS015369 | SRR061254 | Gut                     | Gut   |                                                                      |
| 764042746 | SRS015369 | SRR063556 | Gut                     | Gut   |                                                                      |
| 764042746 | SRS015369 | SRR063557 | Gut                     | Gut   |                                                                      |

|           |           |           |                         |        |                                             |
|-----------|-----------|-----------|-------------------------|--------|---------------------------------------------|
| 764042746 | SRS015369 | SRR063558 | Gut                     | Gut    |                                             |
| 764042746 | SRS015369 | SRR063560 | Gut                     | Gut    |                                             |
| 764042746 | SRS015369 | SRR063561 | Gut                     | Gut    |                                             |
| 764042746 | SRS015369 | SRR063562 | Gut                     | Gut    |                                             |
| 764042746 | SRS015369 | SRR063563 | Gut                     | Gut    |                                             |
| 764042746 | SRS015369 | SRR063564 | Gut                     | Gut    |                                             |
| 764042746 | SRS015369 | SRR063570 | Gut                     | Gut    |                                             |
| 764042746 | SRS015369 | SRR063571 | Gut                     | Gut    |                                             |
| 764042746 | SRS015369 | SRR063576 | Gut                     | Gut    |                                             |
| 764042746 | SRS015369 | SRR063579 | Gut                     | Gut    |                                             |
| 764042746 | SRS015369 | SRR063586 | Gut                     | Gut    |                                             |
| 764042746 | SRS015369 | SRR063587 | Gut                     | Gut    |                                             |
| 764042746 | SRS015369 | SRR063588 | Gut                     | Gut    |                                             |
| 764042746 | SRS015374 | SRR061477 | Buccal mucosa           | Mouth  |                                             |
| 764042746 | SRS015374 | SRR061476 | Buccal mucosa           | Mouth  |                                             |
| 764042746 | SRS015378 | SRR061403 | Supragingival plaque    | Mouth  |                                             |
| 764042746 | SRS015378 | SRR061380 | Supragingival plaque    | Mouth  | HPV4 (1)                                    |
| 764042746 | SRS015381 | SRR061376 | R_Retroauricular crease | Skin   | HPV93 (4)                                   |
| 764042746 | SRS015381 | SRR061369 | R_Retroauricular crease | Skin   | HPV93 (5)                                   |
| 764042746 | SRS015395 | SRR061252 | Tongue dorsum           | Mouth  |                                             |
| 764042746 | SRS015395 | SRR061225 | Tongue dorsum           | Mouth  |                                             |
| 764042746 | SRS015425 | SRR061273 | Posterior fornix        | Vagina | HPV128 (1),HPV135 (3),HPV146 (1),HPV153 (1) |
| 764042746 | SRS015425 | SRR061263 | Posterior fornix        | Vagina | HPV128 (1),HPV135 (2),HPV146 (3),HPV153 (1) |
| 764042746 | SRS062540 | SRR061488 | Tongue dorsum           | Mouth  |                                             |
| 764042746 | SRS062540 | SRR061485 | Tongue dorsum           | Mouth  |                                             |
| 764042746 | SRS062752 | SRR061305 | Vagina introitus        | Vagina |                                             |
| 764042746 | SRS062752 | SRR061290 | Vagina introitus        | Vagina |                                             |
| 764042746 | SRS063215 | SRR061302 | Subgingival plaque      | Mouth  |                                             |
| 764042746 | SRS063215 | SRR061294 | Subgingival plaque      | Mouth  |                                             |
| 764042746 | SRS063351 | SRR061551 | Palatine Tonsils        | Mouth  |                                             |
| 764042746 | SRS063351 | SRR061549 | Palatine Tonsils        | Mouth  |                                             |
| 764042746 | SRS064376 | SRR061304 | Posterior fornix        | Vagina |                                             |
| 764042746 | SRS064376 | SRR061299 | Posterior fornix        | Vagina |                                             |
| 764042746 | SRS064557 | SRR062418 | Gut                     | Gut    |                                             |
| 764042746 | SRS064557 | SRR062417 | Gut                     | Gut    |                                             |
| 764042746 | SRS065179 | SRR062461 | Anterior nares          | Skin   |                                             |
| 764042746 | SRS065179 | SRR062359 | Anterior nares          | Skin   |                                             |
| 764042746 | SRS065310 | SRR062430 | Supragingival plaque    | Mouth  |                                             |
| 764042746 | SRS065310 | SRR062381 | Supragingival plaque    | Mouth  |                                             |
| 764062976 | SRS014979 | SRR061156 | Gut                     | Gut    |                                             |

|           |           |           |                         |        |                                                   |
|-----------|-----------|-----------|-------------------------|--------|---------------------------------------------------|
| 764062976 | SRS014979 | SRR061149 | Gut                     | Gut    |                                                   |
| 764062976 | SRS062520 | SRR061175 | Posterior fornix        | Vagina |                                                   |
| 764062976 | SRS062520 | SRR061155 | Posterior fornix        | Vagina |                                                   |
| 764062976 | SRS063272 | SRR061163 | Buccal mucosa           | Mouth  |                                                   |
| 764062976 | SRS063272 | SRR061162 | Buccal mucosa           | Mouth  |                                                   |
| 764062976 | SRS064449 | SRR061160 | Supragingival plaque    | Mouth  |                                                   |
| 764062976 | SRS064449 | SRR061159 | Supragingival plaque    | Mouth  |                                                   |
| 764062976 | SRS064774 | SRR061500 | Tongue dorsum           | Mouth  |                                                   |
| 764062976 | SRS064774 | SRR061498 | Tongue dorsum           | Mouth  |                                                   |
| 764062976 | SRS065142 | SRR061530 | Anterior nares          | Skin   |                                                   |
| 764062976 | SRS065142 | SRR061512 | Anterior nares          | Skin   |                                                   |
| 764062976 | SRS065504 | SRR061167 | Gut                     | Gut    |                                                   |
| 764062976 | SRS065504 | SRR061152 | Gut                     | Gut    |                                                   |
| 764083206 | SRS015430 | SRR061378 | Anterior nares          | Skin   | HPV127 (1),HPV149 (3),N (6)                       |
| 764083206 | SRS015430 | SRR061373 | Anterior nares          | Skin   | HPV131 (1),HPV148 (2),N (2)                       |
| 764083206 | SRS015431 | SRR061132 | Gut                     | Gut    |                                                   |
| 764083206 | SRS015431 | SRR041658 | Gut                     | Gut    |                                                   |
| 764083206 | SRS015431 | SRR041659 | Gut                     | Gut    |                                                   |
| 764083206 | SRS015431 | SRR041660 | Gut                     | Gut    |                                                   |
| 764083206 | SRS015431 | SRR041661 | Gut                     | Gut    |                                                   |
| 764083206 | SRS015431 | SRR061119 | Gut                     | Gut    |                                                   |
| 764083206 | SRS015431 | SRR061120 | Gut                     | Gut    |                                                   |
| 764083206 | SRS015431 | SRR061121 | Gut                     | Gut    |                                                   |
| 764083206 | SRS015431 | SRR061127 | Gut                     | Gut    |                                                   |
| 764083206 | SRS015434 | SRR061228 | Tongue dorsum           | Mouth  |                                                   |
| 764083206 | SRS015434 | SRR061224 | Tongue dorsum           | Mouth  | HPV32 (3)                                         |
| 764083206 | SRS015436 | SRR061428 | Buccal mucosa           | Mouth  | HPV32 (1)                                         |
| 764083206 | SRS015436 | SRR061424 | Buccal mucosa           | Mouth  |                                                   |
| 764083206 | SRS015440 | SRR061354 | Supragingival plaque    | Mouth  |                                                   |
| 764083206 | SRS015440 | SRR061325 | Supragingival plaque    | Mouth  |                                                   |
| 764083206 | SRS015450 | SRR062515 | Anterior nares          | Skin   | HPV127 (2),HPV132 (1),HPV141 (1),HPV148 (1),N (6) |
| 764083206 | SRS015450 | SRR062506 | Anterior nares          | Skin   | HPV127 (1),HPV144 (1),N (4)                       |
| 764083206 | SRS015470 | SRR062384 | Supragingival plaque    | Mouth  |                                                   |
| 764083206 | SRS015470 | SRR062356 | Supragingival plaque    | Mouth  |                                                   |
| 764083206 | SRS019063 | SRR062397 | L_Retroauricular crease | Skin   | HPV124 (1),HPV126 (2)                             |
| 764083206 | SRS019063 | SRR062345 | L_Retroauricular crease | Skin   |                                                   |
| 764083206 | SRS019064 | SRR061405 | R_Retroauricular crease | Skin   | HPV126 (1),HPV14 (1)                              |
| 764083206 | SRS019064 | SRR061398 | R_Retroauricular crease | Skin   | HPV126 (1)                                        |
| 764083206 | SRS019067 | SRR061394 | Anterior nares          | Skin   | HPV10 (1),HPV148 (1),HPV149 (8),N (1)             |



|           |           |           |                         |        |                                                   |
|-----------|-----------|-----------|-------------------------|--------|---------------------------------------------------|
| 764083206 | SRS019067 | SRR061332 | Anterior nares          | Skin   | HPV112 (1),HPV115 (1),HPV147 (1),HPV149 (6),N (1) |
| 764083206 | SRS019068 | SRR063552 | Gut                     | Gut    |                                                   |
| 764083206 | SRS019068 | SRR041662 | Gut                     | Gut    |                                                   |
| 764083206 | SRS019068 | SRR042182 | Gut                     | Gut    |                                                   |
| 764083206 | SRS019068 | SRR042183 | Gut                     | Gut    |                                                   |
| 764083206 | SRS019068 | SRR042491 | Gut                     | Gut    |                                                   |
| 764083206 | SRS019068 | SRR061123 | Gut                     | Gut    |                                                   |
| 764083206 | SRS019068 | SRR061124 | Gut                     | Gut    |                                                   |
| 764083206 | SRS019068 | SRR061125 | Gut                     | Gut    |                                                   |
| 764083206 | SRS019068 | SRR061131 | Gut                     | Gut    |                                                   |
| 764083206 | SRS019068 | SRR061133 | Gut                     | Gut    |                                                   |
| 764083206 | SRS019068 | SRR063541 | Gut                     | Gut    |                                                   |
| 764083206 | SRS019068 | SRR063546 | Gut                     | Gut    |                                                   |
| 764083206 | SRS019068 | SRR063550 | Gut                     | Gut    |                                                   |
| 764083206 | SRS019071 | SRR062527 | Tongue dorsum           | Mouth  |                                                   |
| 764083206 | SRS019071 | SRR061237 | Tongue dorsum           | Mouth  |                                                   |
| 764083206 | SRS019073 | SRR061397 | Buccal mucosa           | Mouth  |                                                   |
| 764083206 | SRS019073 | SRR061371 | Buccal mucosa           | Mouth  |                                                   |
| 764083206 | SRS019077 | SRR061416 | Supragingival plaque    | Mouth  |                                                   |
| 764083206 | SRS019077 | SRR061337 | Supragingival plaque    | Mouth  |                                                   |
| 764083206 | SRS019081 | SRR062492 | R_Retroauricular crease | Skin   | HPV126 (1)                                        |
| 764083206 | SRS019081 | SRR062442 | R_Retroauricular crease | Skin   | HPV126 (1)                                        |
| 764083206 | SRS019087 | SRR062440 | Anterior nares          | Skin   | HPV149 (6)                                        |
| 764083206 | SRS019087 | SRR062436 | Anterior nares          | Skin   | HPV149 (5)                                        |
| 764143897 | SRS015209 | SRR061550 | Tongue dorsum           | Mouth  |                                                   |
| 764143897 | SRS015209 | SRR061548 | Tongue dorsum           | Mouth  |                                                   |
| 764143897 | SRS015215 | SRR063530 | Supragingival plaque    | Mouth  |                                                   |
| 764143897 | SRS015215 | SRR063522 | Supragingival plaque    | Mouth  |                                                   |
| 764143897 | SRS015217 | SRR061334 | Gut                     | Gut    |                                                   |
| 764143897 | SRS015217 | SRR061331 | Gut                     | Gut    |                                                   |
| 764143897 | SRS015225 | SRR061308 | Posterior fornix        | Vagina |                                                   |
| 764143897 | SRS015225 | SRR061297 | Posterior fornix        | Vagina |                                                   |
| 764143897 | SRS047335 | SRR061296 | Posterior fornix        | Vagina |                                                   |
| 764143897 | SRS047335 | SRR061285 | Posterior fornix        | Vagina |                                                   |
| 764143897 | SRS050484 | SRR063533 | Anterior nares          | Skin   | HPV110 (2),HPV76 (1)                              |
| 764143897 | SRS050484 | SRR063531 | Anterior nares          | Skin   | HPV110 (2)                                        |
| 764143897 | SRS051882 | SRR063549 | Gut                     | Gut    |                                                   |
| 764143897 | SRS051882 | SRR062348 | Gut                     | Gut    |                                                   |
| 764143897 | SRS051882 | SRR062382 | Gut                     | Gut    |                                                   |
| 764143897 | SRS051882 | SRR063538 | Gut                     | Gut    |                                                   |
| 764143897 | SRS051882 | SRR063539 | Gut                     | Gut    |                                                   |

|           |           |           |                         |       |                    |
|-----------|-----------|-----------|-------------------------|-------|--------------------|
| 764143897 | SRS051882 | SRR063548 | Gut                     | Gut   |                    |
| 764143897 | SRS051930 | SRR061216 | Supragingival plaque    | Mouth |                    |
| 764143897 | SRS051930 | SRR061192 | Supragingival plaque    | Mouth |                    |
| 764143897 | SRS056622 | SRR061289 | Tongue dorsum           | Mouth |                    |
| 764143897 | SRS056622 | SRR061281 | Tongue dorsum           | Mouth |                    |
| 764143897 | SRS056892 | SRR061238 | Buccal mucosa           | Mouth | HPV144 (39)        |
| 764143897 | SRS056892 | SRR061193 | Buccal mucosa           | Mouth | HPV144 (43)        |
| 764184357 | SRS048870 | SRR062427 | Gut                     | Gut   |                    |
| 764184357 | SRS048870 | SRR062376 | Gut                     | Gut   |                    |
| 764224817 | SRS015745 | SRR061460 | Buccal mucosa           | Mouth |                    |
| 764224817 | SRS015745 | SRR061444 | Buccal mucosa           | Mouth |                    |
| 764224817 | SRS015752 | SRR063491 | Anterior nares          | Skin  | HPV17 (1),HPV4 (1) |
| 764224817 | SRS015752 | SRR063490 | Anterior nares          | Skin  |                    |
| 764224817 | SRS015755 | SRR061522 | Supragingival plaque    | Mouth |                    |
| 764224817 | SRS015755 | SRR061521 | Supragingival plaque    | Mouth |                    |
| 764224817 | SRS015762 | SRR061243 | Tongue dorsum           | Mouth |                    |
| 764224817 | SRS015762 | SRR061241 | Tongue dorsum           | Mouth |                    |
| 764224817 | SRS015782 | SRR061208 | Gut                     | Gut   |                    |
| 764224817 | SRS015782 | SRR061183 | Gut                     | Gut   |                    |
| 764224817 | SRS046688 | SRR061469 | R_Retroauricular crease | Skin  |                    |
| 764224817 | SRS046688 | SRR061466 | R_Retroauricular crease | Skin  | HPV38 (2)          |
| 764224817 | SRS047044 | SRR061438 | Gut                     | Gut   |                    |
| 764224817 | SRS047044 | SRR061432 | Gut                     | Gut   |                    |
| 764224817 | SRS053584 | SRR062495 | Supragingival plaque    | Mouth |                    |
| 764224817 | SRS053584 | SRR062296 | Supragingival plaque    | Mouth | HPV38 (1)          |
| 764224817 | SRS054776 | SRR062453 | Buccal mucosa           | Mouth |                    |
| 764224817 | SRS054776 | SRR062448 | Buccal mucosa           | Mouth |                    |
| 764224817 | SRS057205 | SRR061502 | Tongue dorsum           | Mouth |                    |
| 764224817 | SRS057205 | SRR061501 | Tongue dorsum           | Mouth |                    |
| 764285508 | SRS015537 | SRR061451 | Tongue dorsum           | Mouth |                    |
| 764285508 | SRS015537 | SRR061441 | Tongue dorsum           | Mouth |                    |
| 764285508 | SRS015540 | SRR063485 | Buccal mucosa           | Mouth |                    |
| 764285508 | SRS015540 | SRR063482 | Buccal mucosa           | Mouth |                    |
| 764285508 | SRS015574 | SRR062528 | Supragingival plaque    | Mouth |                    |
| 764285508 | SRS015574 | SRR062519 | Supragingival plaque    | Mouth |                    |
| 764285508 | SRS015578 | SRR061231 | Gut                     | Gut   |                    |
| 764285508 | SRS015578 | SRR061222 | Gut                     | Gut   |                    |
| 764305738 | SRS015890 | SRR061134 | Gut                     | Gut   |                    |
| 764305738 | SRS015890 | SRR038746 | Gut                     | Gut   |                    |
| 764305738 | SRS015890 | SRR042027 | Gut                     | Gut   |                    |

|           |           |           |                         |       |                                             |
|-----------|-----------|-----------|-------------------------|-------|---------------------------------------------|
| 764305738 | SRS015890 | SRR042181 | Gut                     | Gut   |                                             |
| 764305738 | SRS015890 | SRR042184 | Gut                     | Gut   |                                             |
| 764305738 | SRS015890 | SRR061111 | Gut                     | Gut   |                                             |
| 764305738 | SRS015890 | SRR061112 | Gut                     | Gut   |                                             |
| 764305738 | SRS015890 | SRR061113 | Gut                     | Gut   |                                             |
| 764305738 | SRS015890 | SRR061114 | Gut                     | Gut   |                                             |
| 764305738 | SRS015890 | SRR061129 | Gut                     | Gut   |                                             |
| 764305738 | SRS015893 | SRR061339 | Tongue dorsum           | Mouth |                                             |
| 764305738 | SRS015893 | SRR061322 | Tongue dorsum           | Mouth |                                             |
| 764305738 | SRS015895 | SRR062292 | Buccal mucosa           | Mouth |                                             |
| 764305738 | SRS015895 | SRR062286 | Buccal mucosa           | Mouth |                                             |
| 764305738 | SRS015899 | SRR061363 | Supragingival plaque    | Mouth |                                             |
| 764305738 | SRS015899 | SRR061358 | Supragingival plaque    | Mouth |                                             |
| 764305738 | SRS015921 | SRR062459 | Buccal mucosa           | Mouth |                                             |
| 764305738 | SRS015921 | SRR062458 | Buccal mucosa           | Mouth |                                             |
| 764305738 | SRS018969 | SRR062503 | Tongue dorsum           | Mouth |                                             |
| 764305738 | SRS018969 | SRR062499 | Tongue dorsum           | Mouth |                                             |
| 764305738 | SRS018971 | SRR062314 | Buccal mucosa           | Mouth |                                             |
| 764305738 | SRS018971 | SRR062285 | Buccal mucosa           | Mouth |                                             |
| 764305738 | SRS018975 | SRR062425 | Supragingival plaque    | Mouth |                                             |
| 764305738 | SRS018975 | SRR062330 | Supragingival plaque    | Mouth |                                             |
| 764305738 | SRS018978 | SRR062514 | R_Retroauricular crease | Skin  | HPV151 (166),HPV22 (2)                      |
| 764305738 | SRS018978 | SRR062513 | R_Retroauricular crease | Skin  | HPV148 (1),HPV151 (183),HPV22 (2),HPV36 (2) |
| 764305738 | SRS018981 | SRR061470 | Anterior nares          | Skin  | HPV36 (2)                                   |
| 764305738 | SRS018981 | SRR061465 | Anterior nares          | Skin  | HPV36 (3)                                   |
| 764305738 | SRS018984 | SRR061130 | Gut                     | Gut   |                                             |
| 764305738 | SRS018984 | SRR041654 | Gut                     | Gut   |                                             |
| 764305738 | SRS018984 | SRR041655 | Gut                     | Gut   |                                             |
| 764305738 | SRS018984 | SRR041656 | Gut                     | Gut   |                                             |
| 764305738 | SRS018984 | SRR041657 | Gut                     | Gut   |                                             |
| 764305738 | SRS018984 | SRR061115 | Gut                     | Gut   |                                             |
| 764305738 | SRS018984 | SRR061117 | Gut                     | Gut   |                                             |
| 764305738 | SRS018984 | SRR061118 | Gut                     | Gut   |                                             |
| 764305738 | SRS018984 | SRR061128 | Gut                     | Gut   |                                             |
| 764325968 | SRS015937 | SRR061384 | Anterior nares          | Skin  | HPV132 (1),HPV95 (1),N (1)                  |
| 764325968 | SRS015937 | SRR061383 | Anterior nares          | Skin  | HPV132 (1),N (2)                            |
| 764325968 | SRS015941 | SRR061514 | Tongue dorsum           | Mouth |                                             |
| 764325968 | SRS015941 | SRR061509 | Tongue dorsum           | Mouth |                                             |
| 764325968 | SRS015947 | SRR061517 | Supragingival plaque    | Mouth |                                             |
| 764325968 | SRS015947 | SRR061511 | Supragingival plaque    | Mouth | HPV4 (1)                                    |

|           |           |           |                         |       |                                                  |
|-----------|-----------|-----------|-------------------------|-------|--------------------------------------------------|
| 764325968 | SRS015960 | SRR062524 | Gut                     | Gut   |                                                  |
| 764325968 | SRS015960 | SRR061255 | Gut                     | Gut   |                                                  |
| 764325968 | SRS044626 | SRR061421 | Anterior nares          | Skin  |                                                  |
| 764325968 | SRS044626 | SRR061420 | Anterior nares          | Skin  |                                                  |
| 764325968 | SRS048411 | SRR061590 | Tongue dorsum           | Mouth |                                                  |
| 764325968 | SRS048411 | SRR061585 | Tongue dorsum           | Mouth |                                                  |
| 764325968 | SRS049283 | SRR063473 | Buccal mucosa           | Mouth |                                                  |
| 764325968 | SRS049283 | SRR063472 | Buccal mucosa           | Mouth |                                                  |
| 764325968 | SRS055450 | SRR062523 | Supragingival plaque    | Mouth |                                                  |
| 764325968 | SRS055450 | SRR062522 | Supragingival plaque    | Mouth |                                                  |
| 764325968 | SRS056259 | SRR062530 | Gut                     | Gut   |                                                  |
| 764325968 | SRS056259 | SRR061236 | Gut                     | Gut   |                                                  |
| 764447348 | SRS015985 | SRR061454 | Buccal mucosa           | Mouth |                                                  |
| 764447348 | SRS015985 | SRR061437 | Buccal mucosa           | Mouth |                                                  |
| 764447348 | SRS015989 | SRR061546 | Supragingival plaque    | Mouth |                                                  |
| 764447348 | SRS015989 | SRR061542 | Supragingival plaque    | Mouth |                                                  |
| 764447348 | SRS015996 | SRR061404 | Anterior nares          | Skin  | HPV17 (3)                                        |
| 764447348 | SRS015996 | SRR061387 | Anterior nares          | Skin  | HPV17 (3)                                        |
| 764447348 | SRS016002 | SRR061211 | Tongue dorsum           | Mouth |                                                  |
| 764447348 | SRS016002 | SRR061202 | Tongue dorsum           | Mouth |                                                  |
| 764447348 | SRS016018 | SRR061197 | Gut                     | Gut   |                                                  |
| 764447348 | SRS016018 | SRR061191 | Gut                     | Gut   |                                                  |
| 764447348 | SRS042628 | SRR061212 | Gut                     | Gut   |                                                  |
| 764447348 | SRS042628 | SRR061184 | Gut                     | Gut   |                                                  |
| 764447348 | SRS047254 | SRR061307 | Anterior nares          | Skin  |                                                  |
| 764447348 | SRS047254 | SRR061283 | Anterior nares          | Skin  |                                                  |
| 764447348 | SRS057083 | SRR061309 | R_Retroauricular crease | Skin  | HPV128 (1),HPV147 (8),HPV65 (1),HPV92 (13),N (6) |
| 764447348 | SRS058336 | SRR061352 | Tongue dorsum           | Mouth |                                                  |
| 764447348 | SRS058336 | SRR061342 | Tongue dorsum           | Mouth |                                                  |
| 764487809 | SRS015640 | SRR062312 | Anterior nares          | Skin  | HPV18 (1)                                        |
| 764487809 | SRS015640 | SRR062284 | Anterior nares          | Skin  | HPV18 (2)                                        |
| 764487809 | SRS015644 | SRR062313 | Tongue dorsum           | Mouth |                                                  |
| 764487809 | SRS015644 | SRR062309 | Tongue dorsum           | Mouth |                                                  |
| 764487809 | SRS015646 | SRR061483 | Buccal mucosa           | Mouth |                                                  |
| 764487809 | SRS015646 | SRR061472 | Buccal mucosa           | Mouth |                                                  |
| 764487809 | SRS015650 | SRR063529 | Supragingival plaque    | Mouth |                                                  |
| 764487809 | SRS015650 | SRR063512 | Supragingival plaque    | Mouth |                                                  |
| 764487809 | SRS015663 | SRR061209 | Gut                     | Gut   |                                                  |
| 764487809 | SRS015663 | SRR061205 | Gut                     | Gut   |                                                  |
| 764487809 | SRS042131 | SRR062316 | Tongue dorsum           | Mouth |                                                  |
| 764487809 | SRS042131 | SRR062310 | Tongue dorsum           | Mouth |                                                  |

|           |           |           |                      |        |                                |
|-----------|-----------|-----------|----------------------|--------|--------------------------------|
| 764487809 | SRS047265 | SRR062533 | Supragingival plaque | Mouth  |                                |
| 764487809 | SRS047265 | SRR061217 | Supragingival plaque | Mouth  |                                |
| 764487809 | SRS049744 | SRR062289 | Anterior nares       | Skin   |                                |
| 764487809 | SRS049744 | SRR062280 | Anterior nares       | Skin   | HPV18 (1)                      |
| 764487809 | SRS051031 | SRR061234 | Gut                  | Gut    |                                |
| 764487809 | SRS051031 | SRR061218 | Gut                  | Gut    |                                |
| 764487809 | SRS058105 | SRR062373 | Buccal mucosa        | Mouth  |                                |
| 764487809 | SRS058105 | SRR062325 | Buccal mucosa        | Mouth  |                                |
| 764508039 | SRS016033 | SRR061598 | Anterior nares       | Skin   | HPV2 (5)                       |
| 764508039 | SRS016033 | SRR061592 | Anterior nares       | Skin   | HPV104 (1),HPV155 (1),HPV2 (8) |
| 764508039 | SRS016037 | SRR061516 | Tongue dorsum        | Mouth  |                                |
| 764508039 | SRS016037 | SRR061515 | Tongue dorsum        | Mouth  |                                |
| 764508039 | SRS016039 | SRR061526 | Buccal mucosa        | Mouth  |                                |
| 764508039 | SRS016039 | SRR061523 | Buccal mucosa        | Mouth  |                                |
| 764508039 | SRS016043 | SRR061519 | Supragingival plaque | Mouth  |                                |
| 764508039 | SRS016043 | SRR061518 | Supragingival plaque | Mouth  |                                |
| 764508039 | SRS016056 | SRR061200 | Gut                  | Gut    |                                |
| 764508039 | SRS016056 | SRR061198 | Gut                  | Gut    |                                |
| 764588959 | SRS016086 | SRR061545 | Tongue dorsum        | Mouth  |                                |
| 764588959 | SRS016086 | SRR061540 | Tongue dorsum        | Mouth  |                                |
| 764588959 | SRS016088 | SRR061413 | Buccal mucosa        | Mouth  |                                |
| 764588959 | SRS016088 | SRR061395 | Buccal mucosa        | Mouth  |                                |
| 764588959 | SRS016092 | SRR061366 | Supragingival plaque | Mouth  |                                |
| 764588959 | SRS016092 | SRR061362 | Supragingival plaque | Mouth  |                                |
| 764588959 | SRS016095 | SRR061172 | Gut                  | Gut    |                                |
| 764588959 | SRS016095 | SRR061169 | Gut                  | Gut    |                                |
| 764588959 | SRS016105 | SRR062537 | Anterior nares       | Skin   |                                |
| 764588959 | SRS016105 | SRR062536 | Anterior nares       | Skin   |                                |
| 764588959 | SRS016111 | SRR061275 | Posterior fornix     | Vagina |                                |
| 764588959 | SRS016111 | SRR061274 | Posterior fornix     | Vagina |                                |
| 764649650 | SRS016188 | SRR063467 | Anterior nares       | Skin   |                                |
| 764649650 | SRS016188 | SRR063466 | Anterior nares       | Skin   |                                |
| 764649650 | SRS016191 | SRR061594 | Posterior fornix     | Vagina |                                |
| 764649650 | SRS016191 | SRR061593 | Posterior fornix     | Vagina | HPV38 (1)                      |
| 764649650 | SRS016196 | SRR061536 | Buccal mucosa        | Mouth  |                                |
| 764649650 | SRS016196 | SRR061534 | Buccal mucosa        | Mouth  |                                |
| 764649650 | SRS016200 | SRR063507 | Supragingival plaque | Mouth  |                                |
| 764649650 | SRS016200 | SRR063506 | Supragingival plaque | Mouth  |                                |
| 764649650 | SRS016203 | SRR062539 | Gut                  | Gut    |                                |
| 764649650 | SRS016203 | SRR062538 | Gut                  | Gut    |                                |

|           |           |           |                      |        |                     |
|-----------|-----------|-----------|----------------------|--------|---------------------|
| 764649650 | SRS016225 | SRR061242 | Tongue dorsum        | Mouth  |                     |
| 764649650 | SRS016225 | SRR061233 | Tongue dorsum        | Mouth  |                     |
| 764669880 | SRS016267 | SRR061495 | Gut                  | Gut    |                     |
| 764669880 | SRS016267 | SRR061494 | Gut                  | Gut    |                     |
| 764669880 | SRS019787 | SRR061505 | Gut                  | Gut    |                     |
| 764669880 | SRS019787 | SRR061503 | Gut                  | Gut    |                     |
| 764811490 | SRS042284 | SRR063523 | Gut                  | Gut    | HPV101 (1)          |
| 764811490 | SRS042284 | SRR063513 | Gut                  | Gut    |                     |
| 764811490 | SRS047100 | SRR063518 | Supragingival plaque | Mouth  |                     |
| 764811490 | SRS047100 | SRR063517 | Supragingival plaque | Mouth  |                     |
| 764811490 | SRS049237 | SRR061596 | Posterior fornix     | Vagina |                     |
| 764811490 | SRS049237 | SRR061595 | Posterior fornix     | Vagina |                     |
| 764811490 | SRS052874 | SRR063521 | Buccal mucosa        | Mouth  |                     |
| 764811490 | SRS052874 | SRR063519 | Buccal mucosa        | Mouth  |                     |
| 764811490 | SRS053603 | SRR061439 | Tongue dorsum        | Mouth  |                     |
| 764811490 | SRS053603 | SRR061431 | Tongue dorsum        | Mouth  |                     |
| 764892411 | SRS019867 | SRR061462 | Anterior nares       | Skin   | HPV124 (1)          |
| 764892411 | SRS019867 | SRR061461 | Anterior nares       | Skin   | HPV122 (1)          |
| 764892411 | SRS019872 | SRR061547 | Buccal mucosa        | Mouth  |                     |
| 764892411 | SRS019872 | SRR061543 | Buccal mucosa        | Mouth  |                     |
| 764892411 | SRS019894 | SRR062385 | Tongue dorsum        | Mouth  |                     |
| 764892411 | SRS019894 | SRR062346 | Tongue dorsum        | Mouth  |                     |
| 764892411 | SRS019906 | SRR061262 | Supragingival plaque | Mouth  |                     |
| 764892411 | SRS019906 | SRR061257 | Supragingival plaque | Mouth  |                     |
| 764892411 | SRS019910 | SRR062460 | Gut                  | Gut    |                     |
| 764892411 | SRS019910 | SRR062404 | Gut                  | Gut    |                     |
| 765013792 | SRS018656 | SRR061510 | Gut                  | Gut    |                     |
| 765013792 | SRS018656 | SRR061508 | Gut                  | Gut    |                     |
| 765013792 | SRS018661 | SRR061564 | Buccal mucosa        | Mouth  |                     |
| 765013792 | SRS018661 | SRR061563 | Buccal mucosa        | Mouth  |                     |
| 765013792 | SRS018665 | SRR061566 | Supragingival plaque | Mouth  |                     |
| 765013792 | SRS018665 | SRR061562 | Supragingival plaque | Mouth  |                     |
| 765013792 | SRS018671 | SRR061392 | Anterior nares       | Skin   |                     |
| 765013792 | SRS018671 | SRR061350 | Anterior nares       | Skin   |                     |
| 765013792 | SRS018739 | SRR061250 | Tongue dorsum        | Mouth  |                     |
| 765013792 | SRS018739 | SRR061249 | Tongue dorsum        | Mouth  |                     |
| 765013792 | SRS018769 | SRR062535 | Posterior fornix     | Vagina | HPV16 (2),HPV59 (8) |
| 765013792 | SRS018769 | SRR061264 | Posterior fornix     | Vagina | HPV16 (1),HPV59 (8) |
| 765034022 | SRS019215 | SRR063492 | Anterior nares       | Skin   |                     |
| 765034022 | SRS019215 | SRR063488 | Anterior nares       | Skin   |                     |
| 765034022 | SRS019219 | SRR061458 | Tongue dorsum        | Mouth  |                     |

|           |           |           |                      |        |                                                                                                        |
|-----------|-----------|-----------|----------------------|--------|--------------------------------------------------------------------------------------------------------|
| 765034022 | SRS019219 | SRR061446 | Tongue dorsum        | Mouth  |                                                                                                        |
| 765034022 | SRS019221 | SRR062455 | Buccal mucosa        | Mouth  |                                                                                                        |
| 765034022 | SRS019221 | SRR062454 | Buccal mucosa        | Mouth  |                                                                                                        |
| 765034022 | SRS019225 | SRR061524 | Supragingival plaque | Mouth  |                                                                                                        |
| 765034022 | SRS019225 | SRR061520 | Supragingival plaque | Mouth  |                                                                                                        |
| 765034022 | SRS019245 | SRR062542 | Posterior fornix     | Vagina | HPV101 (2),HPV150 (1),HPV66 (25)                                                                       |
| 765034022 | SRS019245 | SRR061247 | Posterior fornix     | Vagina | HPV101 (2),HPV66 (14)                                                                                  |
| 765034022 | SRS019267 | SRR061154 | Gut                  | Gut    | HPV47 (2)                                                                                              |
| 765034022 | SRS019267 | SRR061150 | Gut                  | Gut    | HPV47 (1)                                                                                              |
| 765074482 | SRS016292 | SRR061527 | Anterior nares       | Skin   | HPV121 (3),HPV126 (2),HPV133 (1),HPV142 (1),HPV143 (1),HPV15 (1),HPV47 (20),HPV5 (1),HPV80 (212),N (1) |
| 765074482 | SRS016292 | SRR061525 | Anterior nares       | Skin   | HPV126 (1),HPV143 (1),HPV23 (1),HPV36 (1),HPV47 (24),HPV80 (209),N (2)                                 |
| 765074482 | SRS016297 | SRR061482 | Buccal mucosa        | Mouth  |                                                                                                        |
| 765074482 | SRS016297 | SRR061481 | Buccal mucosa        | Mouth  |                                                                                                        |
| 765074482 | SRS016319 | SRR061178 | Tongue dorsum        | Mouth  |                                                                                                        |
| 765074482 | SRS016319 | SRR061177 | Tongue dorsum        | Mouth  |                                                                                                        |
| 765074482 | SRS016331 | SRR061176 | Supragingival plaque | Mouth  |                                                                                                        |
| 765074482 | SRS016331 | SRR061171 | Supragingival plaque | Mouth  |                                                                                                        |
| 765074482 | SRS016335 | SRR061161 | Gut                  | Gut    |                                                                                                        |
| 765074482 | SRS016335 | SRR061157 | Gut                  | Gut    |                                                                                                        |
| 765074482 | SRS047014 | SRR063484 | Gut                  | Gut    |                                                                                                        |
| 765074482 | SRS047014 | SRR063483 | Gut                  | Gut    |                                                                                                        |
| 765074482 | SRS049164 | SRR062390 | Gut                  | Gut    |                                                                                                        |
| 765074482 | SRS049164 | SRR062341 | Gut                  | Gut    |                                                                                                        |
| 765094712 | SRS018569 | SRR063516 | Buccal mucosa        | Mouth  |                                                                                                        |
| 765094712 | SRS018569 | SRR063515 | Buccal mucosa        | Mouth  |                                                                                                        |
| 765094712 | SRS018573 | SRR061567 | Supragingival plaque | Mouth  |                                                                                                        |
| 765094712 | SRS018573 | SRR061565 | Supragingival plaque | Mouth  |                                                                                                        |
| 765094712 | SRS018575 | SRR061569 | Gut                  | Gut    |                                                                                                        |
| 765094712 | SRS018575 | SRR061568 | Gut                  | Gut    |                                                                                                        |
| 765094712 | SRS018585 | SRR062319 | Anterior nares       | Skin   | HPV112 (1),HPV136 (1),HPV148 (6),N (1)                                                                 |
| 765094712 | SRS018585 | SRR062318 | Anterior nares       | Skin   | HPV132 (1),HPV148 (1),N (3)                                                                            |
| 765094712 | SRS018591 | SRR062541 | Tongue dorsum        | Mouth  |                                                                                                        |
| 765094712 | SRS018591 | SRR062540 | Tongue dorsum        | Mouth  |                                                                                                        |
| 765094712 | SRS043803 | SRR061504 | Buccal mucosa        | Mouth  |                                                                                                        |
| 765094712 | SRS045197 | SRR061240 | Supragingival plaque | Mouth  | HPV12 (1)                                                                                              |
| 765094712 | SRS045197 | SRR061239 | Supragingival plaque | Mouth  |                                                                                                        |

|           |           |           |                         |        |                                       |
|-----------|-----------|-----------|-------------------------|--------|---------------------------------------|
| 765094712 | SRS051600 | SRR062526 | Anterior nares          | Skin   | HPV119 (1)                            |
| 765094712 | SRS051600 | SRR061261 | Anterior nares          | Skin   | HPV119 (1),HPV130 (1),N (1)           |
| 765094712 | SRS051791 | SRR061434 | Tongue dorsum           | Mouth  |                                       |
| 765094712 | SRS051791 | SRR061433 | Tongue dorsum           | Mouth  |                                       |
| 765094712 | SRS052988 | SRR061351 | R_Retroauricular crease | Skin   | HPV12 (41)                            |
| 765094712 | SRS052988 | SRR061336 | R_Retroauricular crease | Skin   | HPV12 (30),HPV137 (1)                 |
| 765094712 | SRS056519 | SRR063504 | Gut                     | Gut    |                                       |
| 765094712 | SRS056519 | SRR063503 | Gut                     | Gut    |                                       |
| 765135172 | SRS018774 | SRR062307 | Buccal mucosa           | Mouth  |                                       |
| 765135172 | SRS018774 | SRR062304 | Buccal mucosa           | Mouth  |                                       |
| 765135172 | SRS018778 | SRR061544 | Supragingival plaque    | Mouth  |                                       |
| 765135172 | SRS018778 | SRR061541 | Supragingival plaque    | Mouth  |                                       |
| 765135172 | SRS018784 | SRR061535 | Anterior nares          | Skin   |                                       |
| 765135172 | SRS018784 | SRR061513 | Anterior nares          | Skin   |                                       |
| 765135172 | SRS018791 | SRR061146 | Tongue dorsum           | Mouth  |                                       |
| 765135172 | SRS018791 | SRR061141 | Tongue dorsum           | Mouth  |                                       |
| 765135172 | SRS018817 | SRR062355 | Gut                     | Gut    |                                       |
| 765135172 | SRS018817 | SRR062350 | Gut                     | Gut    |                                       |
| 765337473 | SRS019327 | SRR062305 | Tongue dorsum           | Mouth  |                                       |
| 765337473 | SRS019327 | SRR062281 | Tongue dorsum           | Mouth  |                                       |
| 765337473 | SRS019329 | SRR062497 | Buccal mucosa           | Mouth  |                                       |
| 765337473 | SRS019329 | SRR062494 | Buccal mucosa           | Mouth  |                                       |
| 765337473 | SRS019333 | SRR063537 | Supragingival plaque    | Mouth  |                                       |
| 765337473 | SRS019333 | SRR063536 | Supragingival plaque    | Mouth  |                                       |
| 765337473 | SRS019339 | SRR062317 | Anterior nares          | Skin   |                                       |
| 765337473 | SRS019339 | SRR062291 | Anterior nares          | Skin   |                                       |
| 765337473 | SRS019379 | SRR061260 | Posterior fornix        | Vagina |                                       |
| 765337473 | SRS019379 | SRR061248 | Posterior fornix        | Vagina |                                       |
| 765337473 | SRS019381 | SRR061230 | Gut                     | Gut    | HPV47 (2)                             |
| 765560005 | SRS019386 | SRR061406 | Anterior nares          | Skin   | HPV119 (1),HPV136 (1),HPV60 (1),N (1) |
| 765560005 | SRS019386 | SRR061340 | Anterior nares          | Skin   | HPV136 (1)                            |
| 765560005 | SRS019387 | SRR063511 | Supragingival plaque    | Mouth  |                                       |
| 765560005 | SRS019387 | SRR063510 | Supragingival plaque    | Mouth  |                                       |
| 765560005 | SRS019389 | SRR062378 | Tongue dorsum           | Mouth  |                                       |
| 765560005 | SRS019389 | SRR062377 | Tongue dorsum           | Mouth  |                                       |
| 765560005 | SRS019391 | SRR061532 | Buccal mucosa           | Mouth  |                                       |
| 765560005 | SRS019391 | SRR061531 | Buccal mucosa           | Mouth  |                                       |
| 765560005 | SRS019397 | SRR061459 | Gut                     | Gut    |                                       |
| 765560005 | SRS019397 | SRR061456 | Gut                     | Gut    |                                       |
| 765560005 | SRS062878 | SRR061381 | Hard palate             | Mouth  |                                       |



|           |           |           |                      |        |                       |
|-----------|-----------|-----------|----------------------|--------|-----------------------|
| 765560005 | SRS062878 | SRR061364 | Hard palate          | Mouth  |                       |
| 765560005 | SRS063178 | SRR061480 | Anterior nares       | Skin   |                       |
| 765560005 | SRS063178 | SRR061474 | Anterior nares       | Skin   |                       |
| 765560005 | SRS065335 | SRR062293 | Throat               | Mouth  |                       |
| 765560005 | SRS065335 | SRR062290 | Throat               | Mouth  |                       |
| 765620695 | SRS019587 | SRR062300 | Buccal mucosa        | Mouth  |                       |
| 765620695 | SRS019587 | SRR062297 | Buccal mucosa        | Mouth  |                       |
| 765620695 | SRS019591 | SRR062452 | Supragingival plaque | Mouth  | HPV36 (1)             |
| 765620695 | SRS019591 | SRR062450 | Supragingival plaque | Mouth  |                       |
| 765620695 | SRS019597 | SRR062451 | Anterior nares       | Skin   |                       |
| 765620695 | SRS019597 | SRR062445 | Anterior nares       | Skin   |                       |
| 765620695 | SRS019600 | SRR061427 | Posterior fornix     | Vagina |                       |
| 765620695 | SRS019600 | SRR061426 | Posterior fornix     | Vagina |                       |
| 765620695 | SRS019601 | SRR063505 | Gut                  | Gut    |                       |
| 765620695 | SRS019601 | SRR063502 | Gut                  | Gut    |                       |
| 765620695 | SRS019607 | SRR061214 | Tongue dorsum        | Mouth  |                       |
| 765620695 | SRS019607 | SRR061213 | Tongue dorsum        | Mouth  |                       |
| 765640925 | SRS050752 | SRR062447 | Gut                  | Gut    | HPV47 (15)            |
| 765640925 | SRS050752 | SRR062446 | Gut                  | Gut    | HPV47 (19)            |
| 765640925 | SRS052330 | SRR062288 | Posterior fornix     | Vagina |                       |
| 765640925 | SRS052330 | SRR062287 | Posterior fornix     | Vagina |                       |
| 765640925 | SRS053437 | SRR063500 | Anterior nares       | Skin   | HPV132 (1)            |
| 765640925 | SRS053437 | SRR063498 | Anterior nares       | Skin   | HPV115 (1),HPV132 (1) |
| 765640925 | SRS054653 | SRR062493 | Supragingival plaque | Mouth  |                       |
| 765640925 | SRS054653 | SRR062488 | Supragingival plaque | Mouth  |                       |
| 765640925 | SRS056323 | SRR063535 | Tongue dorsum        | Mouth  |                       |
| 765640925 | SRS056323 | SRR063534 | Tongue dorsum        | Mouth  |                       |
| 765640925 | SRS057182 | SRR062479 | Buccal mucosa        | Mouth  |                       |
| 765640925 | SRS057182 | SRR061463 | Buccal mucosa        | Mouth  |                       |
| 765640925 | SRS057182 | SRR061475 | Buccal mucosa        | Mouth  |                       |
| 765640925 | SRS057182 | SRR062476 | Buccal mucosa        | Mouth  |                       |
| 765701615 | SRS046973 | SRR062510 | Anterior nares       | Skin   | HPV58 (1)             |
| 765701615 | SRS046973 | SRR062504 | Anterior nares       | Skin   | N (1)                 |
| 765701615 | SRS049389 | SRR061221 | Tongue dorsum        | Mouth  |                       |
| 765701615 | SRS049389 | SRR061210 | Tongue dorsum        | Mouth  |                       |
| 765701615 | SRS049959 | SRR061220 | Gut                  | Gut    |                       |
| 765701615 | SRS049959 | SRR061215 | Gut                  | Gut    |                       |
| 765701615 | SRS050628 | SRR062311 | Buccal mucosa        | Mouth  |                       |
| 765701615 | SRS050628 | SRR062278 | Buccal mucosa        | Mouth  |                       |
| 765701615 | SRS058808 | SRR062315 | Supragingival plaque | Mouth  |                       |
| 765701615 | SRS058808 | SRR062279 | Supragingival plaque | Mouth  |                       |

|           |           |           |                      |        |           |
|-----------|-----------|-----------|----------------------|--------|-----------|
| 809635352 | SRS022524 | SRR063904 | Gut                  | Gut    |           |
| 809635352 | SRS022524 | SRR060021 | Gut                  | Gut    |           |
| 809635352 | SRS022524 | SRR063903 | Gut                  | Gut    |           |
| 809635352 | SRS022530 | SRR060020 | Tongue dorsum        | Mouth  |           |
| 809635352 | SRS022532 | SRR060032 | Buccal mucosa        | Mouth  |           |
| 809635352 | SRS022536 | SRR060033 | Supragingival plaque | Mouth  |           |
| 809635352 | SRS022545 | SRR060034 | Posterior fornix     | Vagina |           |
| 809635352 | SRS063040 | SRR063909 | Gut                  | Gut    |           |
| 809635352 | SRS063040 | SRR060003 | Gut                  | Gut    | HPV47 (5) |
| 809635352 | SRS063040 | SRR063907 | Gut                  | Gut    |           |
| 809635352 | SRS063040 | SRR063908 | Gut                  | Gut    |           |
| 809635352 | SRS063288 | SRR060005 | Tongue dorsum        | Mouth  |           |
| 809635352 | SRS064704 | SRR060086 | Posterior fornix     | Vagina |           |
| 809635352 | SRS065099 | SRR060456 | Supragingival plaque | Mouth  |           |
| 809635352 | SRS065431 | SRR060002 | Buccal mucosa        | Mouth  |           |
| 823052294 | SRS046344 | SRR061317 | Anterior nares       | Skin   |           |
| 823052294 | SRS048719 | SRR061382 | Buccal mucosa        | Mouth  |           |
| 823052294 | SRS048719 | SRR061372 | Buccal mucosa        | Mouth  |           |
| 823052294 | SRS049712 | SRR061174 | Gut                  | Gut    |           |
| 823052294 | SRS049712 | SRR061165 | Gut                  | Gut    |           |
| 823052294 | SRS057791 | SRR061417 | Tongue dorsum        | Mouth  |           |
| 823052294 | SRS057791 | SRR061399 | Tongue dorsum        | Mouth  |           |
| 861967750 | SRS045254 | SRR063495 | Buccal mucosa        | Mouth  |           |
| 861967750 | SRS045254 | SRR063494 | Buccal mucosa        | Mouth  |           |
| 861967750 | SRS048164 | SRR061343 | Gut                  | Gut    |           |
| 861967750 | SRS048164 | SRR061330 | Gut                  | Gut    |           |
| 861967750 | SRS051244 | SRR061422 | Supragingival plaque | Mouth  |           |
| 861967750 | SRS051244 | SRR061419 | Supragingival plaque | Mouth  |           |
| 861967750 | SRS051613 | SRR062487 | Anterior nares       | Skin   |           |
| 861967750 | SRS051613 | SRR062485 | Anterior nares       | Skin   |           |
| 861967750 | SRS057539 | SRR061589 | Tongue dorsum        | Mouth  |           |
| 861967750 | SRS057539 | SRR061573 | Tongue dorsum        | Mouth  |           |

35 N: unclassified HPV types

36 Table S2. Distribution of HPV types among organs in healthy human subjects

| Subject   | Gut     | Mouth          | Skin                                                                            | Vagina                               | No. HPV <sup>+</sup> organ |
|-----------|---------|----------------|---------------------------------------------------------------------------------|--------------------------------------|----------------------------|
| 158883629 |         | 138,17,N,      | 148,                                                                            | 91,                                  | 3                          |
| 160319967 |         | 62,            | 112,4,                                                                          | 51,6,62,68,83,                       | 3                          |
| 338793263 | 42,     |                | 112,38,42,                                                                      | 42,61,62,72,N,                       | 3                          |
| 763759525 |         | 19,            | 19,                                                                             | 101,                                 | 3                          |
| 764042746 |         | 4,             | 93,                                                                             | 128,135,146,153,                     | 3                          |
| 160400887 | 47,     | 144,           | 107,115,118,12,121,124,127,129,148,17,60,98,N,                                  |                                      | 3                          |
| 246515023 | 101,68, | 80,            |                                                                                 | 67,                                  | 3                          |
| 158458797 |         |                | 127,148,24,N,                                                                   | 121,126,142,144,153,21,74,88,N,      | 2                          |
| 158944319 |         | 8,             |                                                                                 | 43,45,53,61,N,                       | 2                          |
| 160704339 | 47,     |                | 143,37,5,5b,N,                                                                  |                                      | 2                          |
| 550534656 |         | 1,             | 96,                                                                             |                                      | 2                          |
| 763840445 |         | 36,80,N,       | 109,126,19,36,                                                                  |                                      | 2                          |
| 763901136 | 47,     |                | 101,112,119,144,149,155,156,17,50,N,                                            |                                      | 2                          |
| 764143897 |         | 144,           | 110,76,                                                                         |                                      | 2                          |
| 765034022 | 47,     |                |                                                                                 | 101,150,66,                          | 2                          |
| 765640925 | 47,     |                | 115,132,                                                                        |                                      | 2                          |
| 158479027 |         | 38,            | 110,12,120,38,8,                                                                |                                      | 2                          |
| 159510762 |         | 126,26,        | 37,38,                                                                          |                                      | 2                          |
| 159591683 |         | 135,147,17,20, | 133,15,5,80,                                                                    |                                      | 2                          |
| 159611913 |         | 145,           | 149,                                                                            |                                      | 2                          |
| 763496533 |         | 24,            | 4,                                                                              |                                      | 2                          |
| 763961826 |         | 20,66,N,       | 104,107,111,119,120,121,124,130,14,144,147,148,149,153,23,24,75,76,8,80,9,92,N, |                                      | 2                          |
| 764083206 |         | 32,            | 10,112,115,124,126,127,131,132,14,141,144,147,148,149,N,                        |                                      | 2                          |
| 764224817 |         | 38,            | 17,38,4,                                                                        |                                      | 2                          |
| 764325968 |         | 4,             | 132,95,N,                                                                       |                                      | 2                          |
| 765094712 |         | 12,            | 112,119,12,130,132,136,137,148,N,                                               |                                      | 2                          |
| 160502038 | 58,     |                |                                                                                 | 56,                                  | 2                          |
| 638754422 | 47,     |                |                                                                                 | 103,106,18,34,39,51,56,6,73,74,90,N, | 2                          |
| 763820215 | 28,     |                |                                                                                 | 118,131,134,52,89,N,                 | 2                          |
| 158337416 |         |                | 139,                                                                            |                                      | 1                          |
| 159247771 |         |                | 134,149,8,N,                                                                    |                                      | 1                          |
| 160582958 |         |                | 4,                                                                              |                                      | 1                          |
| 160643649 |         |                | 119,120,151,45,65,N,                                                            |                                      | 1                          |
| 508703490 |         |                |                                                                                 | 62,                                  | 1                          |
| 706846339 |         |                | 124,146,                                                                        |                                      | 1                          |
| 763577454 |         |                |                                                                                 | 45,90,                               | 1                          |
| 764649650 |         |                |                                                                                 | 38,                                  | 1                          |
| 765013792 |         |                |                                                                                 | 16,59,                               | 1                          |
| 765337473 | 47,     |                |                                                                                 |                                      | 1                          |
| 765620695 |         | 36,            |                                                                                 |                                      | 1                          |
| 158499257 |         | 12,9,N,        |                                                                                 |                                      | 1                          |
| 159369152 |         | 148,           |                                                                                 |                                      | 1                          |
| 159490532 |         |                | 112,116,119,12,130,134,136,137,142,147,17,19,28,34,4,48,60,76,88,N,             |                                      | 1                          |
| 159551223 |         | 20,50,         |                                                                                 |                                      | 1                          |
| 159571453 |         |                | 142,17,19,21,80,                                                                |                                      | 1                          |
| 159713063 |         |                | 17,23,                                                                          |                                      | 1                          |
| 159814214 |         |                | 110,12,149,                                                                     |                                      | 1                          |
| 160421117 |         |                | 118,122,22,49,50,98,                                                            |                                      | 1                          |
| 160603188 |         |                | 122,137,150,17,20,9,N,                                                          |                                      | 1                          |
| 763860675 |         |                | 146,50,N,                                                                       |                                      | 1                          |
| 763982056 |         | 146,153,       |                                                                                 |                                      | 1                          |
| 764305738 |         |                | 148,151,22,36,                                                                  |                                      | 1                          |
| 764447348 |         |                | 128,147,17,65,92,N,                                                             |                                      | 1                          |
| 764487809 |         |                | 18,                                                                             |                                      | 1                          |
| 764508039 |         |                | 104,155,2,                                                                      |                                      | 1                          |
| 764892411 |         |                | 122,124,                                                                        |                                      | 1                          |
| 765074482 |         |                | 121,126,133,142,143,15,23,36,47,5,80,N,                                         |                                      | 1                          |
| 765560005 |         |                | 119,136,60,N,                                                                   |                                      | 1                          |
| 765701615 |         |                | 58,N,                                                                           |                                      | 1                          |
| 159227541 |         |                |                                                                                 | 66,                                  | 1                          |
| 675950834 | 18,     |                |                                                                                 |                                      | 1                          |
| 764811490 | 101,    |                |                                                                                 |                                      | 1                          |
| 809635352 | 47,     |                |                                                                                 |                                      | 1                          |
| 159268001 |         | 155,98,        |                                                                                 |                                      | 1                          |
| 604812005 |         | 107,32,5,      |                                                                                 |                                      | 1                          |
| 763536994 | 47,     |                |                                                                                 |                                      | 1                          |
| 158924089 |         |                | 124,N,                                                                          |                                      | 1                          |
| 159166850 | 47,     |                |                                                                                 |                                      | 1                          |
| 763678604 | 47,     |                |                                                                                 |                                      | 1                          |
| 158398106 |         |                | 110,17,23,80,                                                                   |                                      | 1                          |
| 158984779 |         |                | 98,                                                                             |                                      | 1                          |
| 158256496 |         |                |                                                                                 |                                      | 0                          |
| 158742018 |         |                |                                                                                 |                                      | 0                          |
| 159753524 |         |                |                                                                                 |                                      | 0                          |

|            |       |     |       |       |        |
|------------|-------|-----|-------|-------|--------|
| 737052003  |       |     |       |       | 0      |
| 764062976  |       |     |       |       | 0      |
| 764588959  |       |     |       |       | 0      |
| 159207311  |       |     |       |       | 0      |
| 160218816  |       |     |       |       | 0      |
| 160765029  |       |     |       |       | 0      |
| 404239096  |       |     |       |       | 0      |
| 763435843  |       |     |       |       | 0      |
| 765135172  |       |     |       |       | 0      |
| 823052294  |       |     |       |       | 0      |
| 861967750  |       |     |       |       | 0      |
| 159915365  |       |     |       |       | 0      |
| 370425937  |       |     |       |       | 0      |
| 158802708  |       |     |       |       | 0      |
| 159005010  |       |     |       |       | 0      |
| 159632143  |       |     |       |       | 0      |
| 160158126  |       |     |       |       | 0      |
| 160380657  |       |     |       |       | 0      |
| 686765762  |       |     |       |       | 0      |
| 764285508  |       |     |       |       | 0      |
| 159146620  |       |     |       |       | 0      |
| 159733294  |       |     |       |       | 0      |
| 763597684  |       |     |       |       | 0      |
| 764002286  |       |     |       |       | 0      |
| 764184357  |       |     |       |       | 0      |
| 764669880  |       |     |       |       | 0      |
| 160178356  |       |     |       |       | 0      |
| 159450072  |       |     |       |       | 0      |
| 159672603  |       |     |       |       | 0      |
| Prevalence | 0.173 | 0.3 | 0.613 | 0.415 | 71/103 |

37  
38  
39  
40  
41  
42  
43  
44  
45  
46  
47  
48  
49  
50  
51  
52  
53  
54  
55  
56  
57  
58  
59  
60  
61  
62  
63  
64  
65  
66  
67

Organs (cells) are highlighted in grey if sequencing files are available or in white if not available for analysis. N: unclassified HPV types

68 Table S3. Large contigs (>500bp) assembled from all the reads in each HPV position sample  
 69 and their best hits in NCBI Genbank

| Body sites | Contigs                  | Length (bp) | Best hits              | Identities (%) | Coverage (%) |
|------------|--------------------------|-------------|------------------------|----------------|--------------|
| Vagina     | SRR062364.hpv_contig_103 | 7,944       | (HQ537734)HPV type 52  | 99.9           | 100.0        |
| Vagina     | SRR062365.hpv_contig_1   | 7,940       | (HQ537734)HPV type 52  | 99.9           | 100.0        |
| Vagina     | SRR062073.hpv_contig_1   | 7,859       | (EF546471)HPV type 53  | 100.0          | 100.0        |
| Vagina     | SRR064532.hpv_contig_1   | 7,723       | (X74476)HPV type 34    | 99.9           | 100.0        |
| Vagina     | SRR064532.hpv_contig_2   | 7,446       | (U89349)HPV type 18    | 99.7           | 100.0        |
| Skin       | SRR062408.hpv_contig_1   | 7,143       | (Y15173)HPV type 75    | 98.5           | 99.9         |
| Vagina     | SRR062073.hpv_contig_3   | 6,581       | (EF202156)HPV type 45  | 99.9           | 100.0        |
| Vagina     | SRR060392.hpv_contig_4   | 5,318       | (EF546473)HPV type 53  | 100.0          | 100.0        |
| Skin       | SRR062412.hpv_contig_2   | 5,148       | (Y15173)HPV type 75    | 98.4           | 100.0        |
| Vagina     | SRR062072.hpv_contig_6   | 4,613       | (EF546473)HPV type 53  | 100.0          | 100.0        |
| Vagina     | SRR060393.hpv_contig_1   | 4,403       | (EF546473)HPV type 53  | 99.1           | 100.0        |
| Vagina     | SRR060392.hpv_contig_2   | 3,969       | (EF202156)HPV type 45  | 100.0          | 99.7         |
| Skin       | SRR062513.hpv_contig_4   | 2,958       | (FN677756)HPV type 151 | 99.6           | 100.3        |
| Mouth      | SRR063710.hpv_contig_1   | 2,784       | (X74475)HPV type 32    | 98.9           | 100.0        |
| Vagina     | SRR060393.hpv_contig_4   | 2,774       | (EF546473)HPV type 53  | 99.9           | 100.0        |
| Vagina     | SRR060393.hpv_contig_9   | 2,435       | (KC470250)HPV type 45  | 100.0          | 100.0        |
| Vagina     | SRR061560.hpv_contig_3   | 2,174       | (M73236)HPV type 42    | 99.7           | 100.0        |
| Skin       | SRR061527.hpv_contig_5   | 2,155       | (Y15176)HPV type 80    | 99.2           | 100.0        |
| Skin       | SRR062412.hpv_contig_1   | 1,972       | (Y15173)HPV type 75    | 98.8           | 100.0        |
| Vagina     | SRR062072.hpv_contig_4   | 1,798       | (KC470250)HPV type 45  | 100.0          | 100.0        |
| Vagina     | SRR061552.hpv_contig_1   | 1,781       | (M73236)HPV type 42    | 99.9           | 100.0        |
| Skin       | SRR061527.hpv_contig_6   | 1,715       | (Y15176)HPV type 80    | 99.8           | 98.5         |
| Skin       | SRR061527.hpv_contig_1   | 1,696       | (Y15176)HPV type 80    | 99.8           | 100.0        |
| Mouth      | SRR063710.hpv_contig_4   | 1,624       | (X74475)HPV type 32    | 99.3           | 100.0        |
| Skin       | SRR062514.hpv_contig_53  | 1,453       | (FN677756)HPV type 151 | 99.4           | 100.0        |
| Vagina     | SRR060392.hpv_contig_1   | 1,353       | (EF546473)HPV type 53  | 100.0          | 100.0        |
| Skin       | SRR061525.hpv_contig_1   | 1,306       | (Y15176)HPV type 80    | 99.8           | 100.0        |
| Vagina     | SRR061560.hpv_contig_7   | 1,273       | (M73236)HPV type 42    | 99.9           | 100.0        |
| Skin       | SRR062514.hpv_contig_80  | 1,227       | (FN677756)HPV type 151 | 99.7           | 99.9         |
| Vagina     | SRR062072.hpv_contig_7   | 1,203       | (KC470251)HPV type 45  | 99.8           | 84.7         |
| Skin       | SRR061360.hpv_contig_15  | 1,187       | (U31790)HPV type 50    | 98.0           | 100.0        |
| Skin       | SRR061525.hpv_contig_3   | 1,168       | (Y15176)HPV type 80    | 99.9           | 100.0        |
| Vagina     | SRR061552.hpv_contig_3   | 1,112       | (M73236)HPV type 42    | 99.9           | 100.0        |
| Skin       | SRR062513.hpv_contig_1   | 1,107       | (FN677756)HPV type 151 | 99.6           | 100.0        |
| Vagina     | SRR060392.hpv_contig_18  | 1,095       | (KC470250)HPV type 45  | 99.8           | 100.0        |
| Skin       | SRR061923.hpv_contig_6   | 1,086       | (X74464)HPV type 9     | 99.5           | 100.0        |
| Vagina     | SRR062072.hpv_contig_24  | 1,058       | (KC470251)HPV type 45  | 100.0          | 99.8         |
| Skin       | SRR062516.hpv_contig_5   | 1,040       | (U31790)HPV type 50    | 96.7           | 100.0        |

|        |                         |     |                        |       |       |
|--------|-------------------------|-----|------------------------|-------|-------|
| Skin   | SRR061948.hpv_contig_16 | 504 | (X74469)HPV type 17    | 98.7  | 100.0 |
| Skin   | SRR061329.hpv_contig_5  | 600 | (U31790)HPV type 50    | 97.3  | 100.0 |
| Mouth  | SRR063675.hpv_contig_23 | 504 | (X74475)HPV type 32    | 99.4  | 100.0 |
| Skin   | SRR062514.hpv_contig_84 | 941 | (FN677756)HPV type 151 | 99.7  | 100.0 |
| Skin   | SRR061360.hpv_contig_6  | 552 | (U31790)HPV type 50    | 96.9  | 100.0 |
| Skin   | SRR061329.hpv_contig_7  | 806 | (U31790)HPV type 50    | 96.8  | 100.0 |
| Vagina | SRR060392.hpv_contig_15 | 889 | (M38198)HPV type 45    | 98.2  | 100.0 |
| Vagina | SRR060393.hpv_contig_14 | 892 | (AM283449)HPV type 53  | 99.6  | 62.8  |
| Skin   | SRR061525.hpv_contig_8  | 906 | (Y15176)HPV type 80    | 99.9  | 98.8  |
| Skin   | SRR061527.hpv_contig_2  | 550 | (Y15176)HPV type 80    | 100.0 | 100.0 |
| Vagina | SRR061733.hpv_contig_1  | 665 | (X74476)HPV type 34    | 99.5  | 100.0 |
| Vagina | SRR060393.hpv_contig_6  | 778 | (AJ620205)HPV type 43  | 98.7  | 100.0 |
| Vagina | SRR060393.hpv_contig_3  | 778 | (AJ620205)HPV type 43  | 99.0  | 100.0 |
| Vagina | SRR061552.hpv_contig_22 | 536 | (U31793)HPV type 61    | 100.0 | 99.4  |
| Vagina | SRR060427.hpv_contig_11 | 514 | (EF177179)HPV type 56  | 100.0 | 100.0 |
| Vagina | SRR060427.hpv_contig_8  | 664 | (X74483)HPV type 56    | 99.8  | 99.7  |
| Vagina | SRR062072.hpv_contig_15 | 542 | (EF546473)HPV type 53  | 99.6  | 100.0 |
| Vagina | SRR061560.hpv_contig_1  | 970 | (M73236)HPV type 42    | 100.0 | 100.0 |
| Vagina | SRR061560.hpv_contig_21 | 931 | (M73236)HPV type 42    | 99.8  | 100.0 |
| Vagina | SRR061552.hpv_contig_10 | 903 | (M73236)HPV type 42    | 99.9  | 100.0 |
| Vagina | SRR061560.hpv_contig_2  | 837 | (M73236)HPV type 42    | 99.9  | 100.0 |
| Vagina | SRR061552.hpv_contig_8  | 821 | (M73236)HPV type 42    | 99.1  | 97.4  |
| Vagina | SRR061552.hpv_contig_6  | 681 | (M73236)HPV type 42    | 99.9  | 100.0 |
| Vagina | SRR061552.hpv_contig_11 | 641 | (M73236)HPV type 42    | 99.5  | 100.0 |
| Vagina | SRR061552.hpv_contig_2  | 542 | (M73236)HPV type 42    | 99.8  | 100.0 |
| Vagina | SRR061552.hpv_contig_14 | 509 | (M73236)HPV type 42    | 100.0 | 100.0 |
| Mouth  | SRR063710.hpv_contig_5  | 838 | (X74475)HPV type 32    | 99.2  | 100.0 |
| Skin   | SRR061923.hpv_contig_39 | 722 | (X74464)HPV type 9     | 99.6  | 100.0 |
| Vagina | SRR060393.hpv_contig_7  | 930 | (KC470256)HPV type 45  | 100.0 | 100.0 |
| Vagina | SRR061560.hpv_contig_22 | 523 | (U31793)HPV type 61    | 99.8  | 100.0 |
| Skin   | SRR061360.hpv_contig_9  | 623 | (U31790)HPV type 50    | 90.1  | 100.0 |
| Skin   | SRR062514.hpv_contig_1  | 965 | (FN677756)HPV type 151 | 99.7  | 100.0 |
| Skin   | SRR062513.hpv_contig_2  | 626 | (FN677756)HPV type 151 | 98.9  | 100.0 |
| Skin   | SRR061923.hpv_contig_23 | 513 | (X74464)HPV type 9     | 99.0  | 77.6  |
| Skin   | SRR061351.hpv_contig_2  | 510 | (X74466)HPV type 12    | 99.8  | 100.0 |
| Skin   | SRR062516.hpv_contig_2  | 949 | (U31790)HPV type 50    | 96.1  | 99.8  |
| Skin   | SRR061360.hpv_contig_2  | 927 | (U31790)HPV type 50    | 98.1  | 100.0 |
| Skin   | SRR062516.hpv_contig_8  | 908 | (U31790)HPV type 50    | 97.4  | 100.0 |
| Skin   | SRR061360.hpv_contig_1  | 852 | (U31790)HPV type 50    | 96.0  | 100.0 |
| Mouth  | SRR063710.hpv_contig_2  | 753 | (X74475)HPV type 32    | 99.3  | 100.0 |
| Skin   | SRR062516.hpv_contig_11 | 736 | (U31790)HPV type 50    | 98.5  | 99.9  |

|        |                         |     |                        |       |       |
|--------|-------------------------|-----|------------------------|-------|-------|
| Skin   | SRR061329.hpv_contig_2  | 702 | (U31790)HPV type 50    | 96.6  | 100.0 |
| Skin   | SRR062516.hpv_contig_9  | 675 | (U31790)HPV type 50    | 96.6  | 100.0 |
| Skin   | SRR061329.hpv_contig_11 | 577 | (U31790)HPV type 50    | 98.4  | 99.8  |
| Skin   | SRR062516.hpv_contig_7  | 570 | (JX429973)HPV type 156 | 75.8  | 52.1  |
| Vagina | SRR061560.hpv_contig_4  | 532 | (U31793)HPV type 61    | 100.0 | 100.0 |
| Skin   | SRR061329.hpv_contig_1  | 502 | (U31790)HPV type 50    | 98.0  | 100.0 |

70  
71  
72  
73  
74  
75  
76  
77  
78
